1 **The landscape of DNA methylation associated with the**  
2 **transcriptomic network in laying hens and broilers gets insight into**  
3 **embryonic muscle development in chicken**

4

5

6 Zihao Liu<sup>‡</sup>, Xiaoxu Shen<sup>‡</sup>, Shunshun Han<sup>‡</sup>, Yan Wang<sup>‡</sup>, Qing Zhu, Can  
7 Cui, Haorong He, Jing Zhao, Yuqi Chen, Yao Zhang, Lin Ye, Zhichao  
8 Zhang, Diyan Li, Xiaoling Zhao and Huadong Yin<sup>#</sup>

9

10 Farm Animal Genetic Resources Exploration and Innovation Key Laboratory of  
11 Sichuan Province, Sichuan Agricultural University, Chengdu, Sichuan 611130, PR  
12 China

13

14 <sup>‡</sup> These authors contributed equally to this work.

15

16 <sup>#</sup> Corresponding author:

17 **Huadong Yin**, Farm Animal Genetic Resources Exploration and Innovation Key  
18 Laboratory of Sichuan Province, Sichuan Agricultural University, Chengdu, Sichuan  
19 611130, PR China. E-mail: [yinhuadong@sicau.edu.cn](mailto:yinhuadong@sicau.edu.cn)

## 20 **Abstract**

21 As DNA methylation is one of the key epigenetic mechanisms  
22 involved in embryonic development, elucidating its relationship with  
23 non-coding RNA and genes is essential for understanding early  
24 development of life. In this study, we performed single-base-resolution  
25 bisulfite sequencing together with RNA-seq to explore the genetic basis  
26 of embryonic muscle development in chicken. Comparison of methylome  
27 profiles between broilers and layers revealed that lower methylation in  
28 broilers might contribute to the muscle development. Differential  
29 methylated region analysis between two chicken lines showed that the  
30 majority of DMRs were hypo-DMRs for broilers. Differential methylated  
31 genes were significantly enriched in muscle development related terms at  
32 E13 and E19. Furthermore, by constructing the network of the lncRNA,  
33 we identified a lncRNA named MYH1-AS that potentially regulated  
34 muscle development. These findings depicted an integrative landscape of  
35 late period of embryonic myogenesis in chicken and gave rise to a  
36 comprehensive understanding of epigenetic and transcriptional regulation  
37 in the skeletal muscle development. In addition, our study provided a  
38 reliable epigenetic resource for further muscle studies.

39

## 40 **Introduction**

41 Epigenetics including DNA methylation, histone modification,

42 non-coding RNAs and chromatin remodeling fascinate researchers in  
43 recent year because of their essential roles in various biological  
44 processes<sup>1,2</sup>. The functions of epigenetics have been reported in many  
45 aspects such as in human diseases<sup>3</sup>, oogenesis and spermatogenesis<sup>4</sup> as  
46 well as in adipose and muscle development<sup>5-7</sup>. DNA methylation is one of  
47 the epigenetic mechanisms that has been reported to exert considerable  
48 influence within regulation of the gene expression without changing the  
49 DNA methylation<sup>8</sup>. Its role in muscle development has been illustrated in  
50 human<sup>9</sup>, pig<sup>5,6</sup>, rabbit<sup>10</sup>, bovine<sup>11</sup> and chicken as well<sup>12</sup>.

51 Embryonic stage is crucial for mammal's muscle development as the  
52 number of muscle fiber keeps stable after birth. Therefore, it is interesting  
53 to study the embryonic muscle development from DNA methylation  
54 aspect. DNA methylation functioning in embryonic muscle development  
55 has been widely reported. For instance, ELVIRA CARRIO at el<sup>13</sup> built the  
56 methylome of myogenic stem cell and proved the importance of DNA  
57 methylation-mediated regulation of the cell-identity Myf5 super-enhancer  
58 during muscle-stem cell differentiation. Besides, lncRNAs were also  
59 proved to be important in regulation of muscle development for example,  
60 linc-MD1 interact with miR-133 and miR-135 to regulate the expression  
61 of transcription factors MAML1 and MEF2C that activate the  
62 muscle-specific gene expression<sup>7</sup>. Recently, the methylation and lncRNA  
63 regulatory relationship has drawn extensive attentions of researchers. A

64 database of methylation and lncRNA regulatory relationship has been  
65 built for human diseases studies<sup>14</sup>. In human, DNA methylation and  
66 lncRNA regulatory relationship were widely reported to be involve in  
67 tumorigenesis<sup>15-17</sup> whereas this regulatory relationship about muscle  
68 development is limited. The role of methylation in embryonic muscle  
69 development still remains unclear, although studies have been done in  
70 related field, such as Zhang et al<sup>5</sup> reported the regulatory relationship of  
71 lincRNA and DNA methylation functions in muscle development in pig.  
72 Yang et al<sup>6</sup> revealed that DNA methylation potentially affects gene  
73 expression in skeletal muscle to influence the propensity for obesity and  
74 body size.

75 The chicken is an ideal model for studying the embryogenesis and  
76 early muscle development because the accessibility of egg. Several  
77 genome-wide methylation studies have been reported in chicken.  
78 Basically, the relationship between DNA methylation level of promoter  
79 and expression level of genes were identified<sup>18-20</sup>. However, its role in  
80 chicken's embryonic muscle development has not been fully understood  
81 although global methylation landscape of muscle development was  
82 described in chicken using juvenile and later laying-period hens<sup>12</sup>. The  
83 ROSS 308 is one of the broilers bred and raised specifically  
84 for meat production whereas the Lohmann pink hen is a kind of layer  
85 bred and raised specifically for laying edible eggs. As they have

86 extremely different muscle accumulation and similar genetic background,  
87 they are good contrast model for muscle study. Here we used the whole  
88 genome bisulfite sequencing to produce the methylomes of 12 ROSS 308  
89 and 12 Lohmann pink hen. In order to explore the effect of methylation  
90 and lncRNAs relationship on muscle development, we sequenced the  
91 whole transcriptome of these 24 samples by RNA-seq simultaneously for  
92 the multi-Omics integrative analyses.

93

## 94 **Results**

### 95 **Overview of DNA Methylation**

96 For genomic methylation data among 24 samples, the average  
97 sequence depth is about 30.3X. Approximately 3.4 billion reads were  
98 generated by the Illumina HiSeq in total and an average of 71.99% clean  
99 reads were mapped to the *Gallus gallus* genome (version 5.0)  
100 (Supplementary Table S1). The coverage analysis revealed that  
101 approximately 82% of the *Gallus gallus* genome were covered by reads at  
102 least one-fold, whereas nearly 78% of genome were covered more than  
103 5-fold and 75% of genome were covered more than 10-fold  
104 (Supplementary Table S2). Those result indicated a reliable sequencing  
105 outcome.

106 The methylation level of each developmental stages was displayed  
107 in Fig 1a, revealing the layers and broilers have a similar global

108 methylation profile. The mCpGs in three different contexts showed  
109 similar proportion among 4 developmental stages (Fig 1b). Next, the  
110 methylation level distribution of mCpGs were analyzed at 4  
111 developmental stages. Generally, mCpGs showed a high methylation  
112 level in mCG context whereas showed a low methylation level in mCHG  
113 and mCHH contexts (Fig 1c and Supplementary Fig 1a). Then we  
114 measured the methylation level of different regions of gene and compared  
115 those in different stages and populations. Interestingly, we found that  
116 broilers showed statistically lower methylation level at all stages in mCG  
117 context than layers (Fig 1d). Besides, CpG islands (CGIs) were identified  
118 and the numbers of CGIs at different regions were counted  
119 (Supplementary Fig 1b). we observed more CGIs located in promoter  
120 regions of gene in broilers than layers, which indicates methylation in  
121 CGIs may involve in muscle development as CGIs located at promoters  
122 regions are important for controlling gene expression<sup>21</sup>.

123 Furthermore, the methylation level of lncRNAs assembled in  
124 RNA-seq of this experiment was also analyzed in similar way and  
125 compared with those of genes. Generally, broilers still showed lower  
126 methylation level in various types of lncRNA in mCG and mCHH  
127 contexts compared to laying hens whereas similar methylation level was  
128 observed among different types of lncRNA (Fig 2b and Supplementary  
129 Fig 2 c-d). Genes and lncRNAs had similar global methylation level and

130 both showed significant difference between two populations (Fig 2a and  
131 Supplementary Fig 2a-b). Those results suggest that faster muscle  
132 development of broilers may due to the lower methylation level in late  
133 embryonic stage compared with layer. Besides, the genomic distribution  
134 pattern of DNA methylation around genes and lncRNAs were analyzed.  
135 The upstream (2kb), first exon, first intron, internal exon, internal intron,  
136 last exon and downstream (2kb) of genes and lncRNAs across the  
137 genome were divided as different features and their methylation levels  
138 were measured through 20 bins, respectively. In general, the 5' upstream  
139 and 3'downstream regions were lower methylated than gene body regions.  
140 Besides, we also compared methylation level of features of gene with  
141 features of lncRNA (Fig 2c-d). It resulted that lncRNAs have relatively  
142 higher methylation level around TSS compared with genes ( $P<0.001$ ). In  
143 addition, methylation levels of different types of repeat region were also  
144 analyzed across the genome. Beside the significant differences between  
145 two populations, short interspersed nuclear elements (SINE) particularly  
146 showed lower methylation level across 4 stages in mCG context (Fig 3  
147 and Supplementary Fig 3).

148

#### 149 **Identification of differential methylation regions and genes.**

150 To explore the potential causes of divergences in muscle  
151 development between broilers and layers, the differential methylation loci

152 (DMLs) were identified in DSS package. Then DMRs were identified for  
153 E10, E13, E16 and E19 respectively based on DMLs. The DMRs were  
154 subsequently annotated to the genome and the distribution of the DMRs  
155 in whole genome were analyzed (Fig 4a and Supplementary Table S4-S7).  
156 Generally, the majority of DMRs located in intronic regions whereas a  
157 small part of DMRs distributed in promoters of gene (Fig 4a). The  
158 proportion analysis revealed that broilers had more hypomethylated  
159 regions across the genome in four developmental stages, indicating that  
160 low methylation in muscle development-related genes may account for  
161 broiler's fast muscle development (Fig 4b).

162 Subsequently, the differential methylation genes (DMGs) were  
163 defined as genes overlapped with at least one DMR in its body region.  
164 The Gene Ontology (GO) enrichment analyses were performed to  
165 investigate potential biological functions of the DMGs. Generally, DMGs  
166 in four developmental stages were most significantly enriched in terms  
167 related to nervous system. However, many muscle-related terms were  
168 also found in the lists especially at DMGs of E13 and E19 such as muscle  
169 organ development (47 genes; Q-value < 0.001), myotube cell  
170 development (12 genes; Q-value < 0.005), positive regulation of muscle  
171 organ development (17genes; Q-value < 0.001), and muscle cell  
172 differentiation (51 genes; Q-value < 0.003) etc. (Fig 4c, Supplementary  
173 Table S8-S11). Because DMRs were not unanimous among different



174 developmental stages, we merged the genomic position of DMRs of 24  
175 samples to form common DMRs and re-calculated the methylation level  
176 for each common DMR. The clustering analysis was performed using the  
177 common DMRs and displayed through heatmap. Different developmental  
178 stages were shown to cluster together which is indicative of the high  
179 quality of sampling and DMR calling in this experiment (Fig 5a).  
180 Moreover, the result of PCA was coincided with the clustering analysis  
181 (Fig 5b).

182

### 183 **Integrative analyses of DNA methylation and transcriptome**

184 To further explore whether methylation influences the gene and  
185 lncRNA expression in chicken, RNA-seq were used to measure the  
186 expression of genes and assembled novel lncRNAs. We identified 20656  
187 lncRNAs in total (Fig 6a). Most of them are lincRNAs (63.6%) (Fig 6b).  
188 Heatmap of 24 samples and PCA suggested developmental stages  
189 accounted for most variances (Fig 6c). We divided genes and lncRNAs  
190 into 5 groups respectively based on their expression level (highest,  
191 medium high, medium low and lowest) using a quantile way. Then we  
192 measured their methylation level in different groups of genes and  
193 lncRNAs, respectively. Generally, broilers and layers were shown to have  
194 similar methylation levels and negative correlation was observed in genes  
195 in both populations as the highest expression level group showed lowest

196 methylation level around TSS whereas the lowest expression level group  
197 showed the highest methylation level (Fig 6d, e). Interestingly, this  
198 negative correlation trend between expression and methylation was  
199 observed in downstream region of lncRNAs but not around TSS (Fig 6f,  
200 g). Moreover, the lncRNAs are usually higher methylated around TSS  
201 compared to genes (Fig 6d-g).

202 Next, the differential expression genes (DEGs) and lncRNA (DELs)  
203 calling were performed for subsequent analysis. Meanwhile, the cis-target  
204 and trans-target of lncRNAs were predicted, respectively. The DMRs  
205 were assigned to lncRNAs generated from RNA-seq in this study  
206 (Supplementary Table S12-S15) and the differential methylation lncRNA  
207 (DM lncRNA) were defined as DEL overlapped with DMR. The result  
208 showed that 55 DM lncRNAs were identified (13,16,11,15 in 4 stages,  
209 respectively) (Supplementary Table S16). Subsequently, we looked for  
210 DM lncRNA that was potential to regulate muscle development. In  
211 particular, the expression of a lncRNA (we named it MYH1-AS, Fig 7a)  
212 was highly correlated with methylation level of the DMR assigned to it  
213 (Spearman,  $Cor=-0.7513$ ,  $p<10^{-4}$ , Fig 7b). The expression of MYH1-AS  
214 was detected to dramatically increase in broilers compared to laying hens  
215 at E16 and E19 (Fig 8a). As the lncRNA was predicted by lncTar to  
216 target several genes in MYH1 chicken-specific isoforms like MYH1A,  
217 MYH1G, MYH1E etc., the expression correlations between the lncRNA

218 and its targets were calculated to search for its most likely target. Among  
219 its targets, MYH1E showed the highest correlation with MYH1-AS (Fig  
220 7c), indicative of potential target of MYH1-AS. To further explore the  
221 role of MYH1-AS in muscle development, the gene-lncRNA networks  
222 were constructed based on their mRNA expression connectivity using  
223 WGCNA and the subnetwork of MYH1-AS was extracted from the  
224 whole network. It revealed that MYH1-AS had a high correlation with  
225 some muscle-related genes in this subnetwork (Fig 7d). Moreover, the  
226 relationship between connectivity and correlation was visualized in Fig 7f.  
227 Interestingly, genes highly negatively correlated with MYH1-AS did not  
228 show high connectivity with it. All genes showing high connectivity with  
229 MYH1-AS were also highly positively correlated with the lncRNA (Fig  
230 7e-f). Then a total of 168 genes with top 50% both high connectivity and  
231 correlation with MYH1-AS were selected to perform GO enrichment  
232 analysis in order to confirm the role of MYH1-AS in muscle (Fig 7g and  
233 Supplementary S17). The result showed that the majority of terms  
234 enriched by those genes were muscle related.

235 Furthermore, the expressions of MYH1-AS produced by RNA-seq  
236 were verified through qPCR and it showed that similar trend was  
237 observed, indicating a reliable sequencing outcome (Fig 8 a, b).  
238 Subsequently, a siRNA was designed to perform MYH1-AS silencing  
239 assay. As shown in fig 8c, expression of MYH1-AS was significantly

240 reduced after transfecting, indicative of efficiency of siRNA used in this  
241 experiment (Fig 8c). Then the mRNA expression of muscle related genes  
242 (MyoD1, MyoG and MyH3) were measured at 48h after MYH1-AS  
243 silencing. It resulted in a reduced mRNA expression in silencing groups  
244 compared to control groups (Fig 8d-f). Besides, the microscope was used  
245 to monitor the morphological change in myotubes after silencing. We  
246 found that MYH1-AS silencing resulted in a reduced number of myotube  
247 (Fig 8g-h). Further western blot assay revealed that the protein expression  
248 of MyhC and MyoG was repressed in silencing groups (Fig 8i). Those  
249 results suggest that lncRNA MYH1-AS may function in muscle  
250 differentiation.

251

## 252 **Discussion**

253 The chicken provides a unique model to study embryology research  
254 of animal because of the accessibility of egg. As one of the most  
255 important energy sources for human diet, the muscle development of  
256 chicken is a significant commercial feature worthy for studies. In this  
257 study, the broilers and laying hens were used to explore the muscle  
258 development of chicken in late embryonic period as they are artificially  
259 selected for different commercial use thereby are divergent in muscle  
260 development. Because of the crucial role of methylation in  
261 embryogenesis<sup>13</sup>, we performed whole genome bisulfite sequencing

262 (WGBS) and RNA-seq for to systematically explore the prenatal  
263 landscapes of chicken muscle development. Previous methylome studies  
264 have been done using prenatal chicken or born chicken muscle<sup>12,22,23</sup>,  
265 however, those studies fails to display a comprehensive landscape of  
266 embryonic stages. We focused on more systematical study range from  
267 E10 to E19 between two chicken lines and aimed to elucidate the detail  
268 of embryonic muscle development.

269 The methylation level and proportion of different methylation  
270 contexts (mCG, mCHG, mCHH) of each developmental stage (Fig 1 a-d)  
271 indicated the layers and broilers have a similar global methylation profile.  
272 Additionally, the methylation level of different types of mCgG were  
273 measured (Fig 1 e-g). Those results are coincided with previous studies in  
274 chicken muscle<sup>18</sup>. The distribution proportion of mCpG in genome was  
275 different from the study of Zhang et al<sup>23</sup> as the mCpG in repeat region  
276 accounts for less genomic proportion in our study, probably because they  
277 used born chicken whereas the we performed the experiment on prenatal  
278 chicken. However, more studies were required to explore the detail.

279 We next comprehensively compared the methylation level of genes  
280 and lncRNAs among different developmental stages and chicken lines  
281 (Fig 2a). Generally, laying hens showed a significantly higher  
282 methylation level than broilers in mCG context in both genes and  
283 lncRNAs, which may be responsible for their divergences in muscle

284 development. Furthermore, different types of lncRNA (sense, intronic,  
285 antisense and lincRNA) were globally compared at methylation level and  
286 there were no significant differences among different types of lncRNAs,  
287 although layers and broilers still revealed significant variances (Fig 2b).  
288 Then genomic methylation around genes and lncRNAs were measured  
289 across the genome and the transcription start sites (TSS) were detected to  
290 be low methylated in genes (Fig 2c). The broilers and layers showed the  
291 similar trends around the transcription start site (TSS) which is coincident  
292 with the patterns of previous studies in chicken<sup>12,18</sup>, as well as in bovine  
293 muscle tissue<sup>11</sup> and pig<sup>24</sup>. However, TSS of lncRNAs were usually higher  
294 methylated compare to genes (Fig 2c-d), which is able to explain why  
295 mRNA expression of lncRNAs are usually lower than genes ( $P < 10^{-8}$ )  
296 because methylation in promoter region usually affects gene expression<sup>25</sup>.  
297 In addition, the methylation level of different types of TEs (SINE, LINE,  
298 LTR, DNA and Satellite) were also measured in genome (Fig 3) and  
299 layers were found higher methylated than broilers in TEs regions.  
300 Transposable elements are usually inactivated in animals but TEs were  
301 reported to have a present-day function in early development of human  
302 and other mammals to provide cis-regulatory elements that co-ordinate  
303 the expression of groups of genes<sup>26</sup>. As epigenetic regulation is important  
304 for activity of TEs<sup>27</sup>, the difference showed in the two chicken lines may  
305 also account for the divergence in development.

306 The clustering heatmap and principle component analysis (PCA)  
307 were performed using common DMRs among 4 developmental stages.  
308 The expected classifications were observed in both analyses and indicated  
309 the reliable outcomes of sequencing and DMR calling (Fig 5a-b).  
310 Moreover, we found that DMRs between two chicken lines mainly  
311 distributed in intron regions and intergenic regions (Fig 4a), whose result  
312 is coincide with previous study in chicken<sup>12</sup>, indicative of its important  
313 role in development regulation. However, as methylation in gene body  
314 region affects gene expression in several sophisticated ways<sup>21</sup>, further  
315 studies on how methylation of the intron regions influences gene  
316 expression are required to elucidate the complicated epigenetic  
317 mechanism underlying development in chickens. Furthermore, the  
318 proportion of hyper and hypo methylated regions were analyzed and the  
319 majority of DMRs were detected to be hypomethylated regions in broilers,  
320 indicating that low methylation may be responsible for fast muscle  
321 development. This result was coincided with former result in this study  
322 (Fig 4b, Fig 2a-b). Subsequently, genes with overlapped with DMR at  
323 different times were regarded as DMGs and used for GO enrichment  
324 analysis, respectively. We found that DMGs at E13 and E19 were  
325 significantly enriched in muscle related terms, suggesting that  
326 methylation play an important role in embryonic stage muscle  
327 development. Additionally, DMGs among 4 stages were both

328 significantly enriched in nerve development related terms, which may  
329 relate to the impact of domestication and artificial breeding. Integrative  
330 analysis was conducted to study the association between methylation  
331 level and mRNA expression. We noticed that mRNA and methylation  
332 level around TSS were negative correlated in genes which was widely  
333 proved but not lncRNAs, indicating that DNA methylation regulates  
334 lncRNA expression in a more complex way.

335 To explore which lncRNA may potentially influence muscle  
336 development, the DM lncRNAs were identified and the correlation  
337 between DM lncRNA and DMR assigned to it were measured. In  
338 particular, we noticed that MYH1-AS showed high correlation with its  
339 target MYH1E and the DMR located in its intron region. Further  
340 WGCNA analysis revealed that some muscle related genes were highly  
341 correlated with MYH1-AS in its subnetwork (Fig 7d). For example,  
342 MYLK2, a muscle-specific gene, expresses skMLCK specifically  
343 in skeletal muscles<sup>28,29</sup>. ABLIM1 was reported to be related to muscle  
344 weakness and atrophy<sup>30</sup>. Increased PDK4 expression may be required for  
345 the stable modification of the regulatory characteristics of PDK observed  
346 in slow-twitch muscle in response to high-fat feeding<sup>31</sup> and some other  
347 genes in the network such as MyoZ1, MYPN, ZBTB16 etc. were also  
348 revealed to be muscle or meat quality related genes<sup>32-35</sup>. Therefore, it is  
349 reasonable that MYH1-AS functions in muscle development. Notably, as



350 we noticed that high correlation did not exactly mean high connectivity  
351 either (Fig 7e), we also performed GO enrichment analysis using 168  
352 genes which had top 50% both high connectivity and correlation values  
353 with MYH1-AS in its network as input. It resulted in GO terms of which  
354 the majority were muscle related terms (Fig 7g), strongly indicative of the  
355 MYH1-AS functioning in muscle development. Therefore, it is  
356 reasonable to assume that MYH1-AS was regulated by DNA methylation  
357 and participated muscle development during embryonic stage.  
358 Subsequent silencing and western blot assay verified our analysis results,  
359 suggesting the reliability of our analysis and the role of MYH1-AS in  
360 muscle differentiation. However, how the lncRNA regulates muscle  
361 development requires more studies.

362 Our experiment revealed a comprehensive landscape of DNA  
363 methylome and transcriptome during embryonic developmental stage.  
364 Besides, we also found one lncRNA named MYH1-AS may potentially  
365 play a part in muscle development in chicken and provided evidence for  
366 this conclusion. Moreover, we provided a resource for further  
367 investigating the genetic regulation of methylation and gene expression in  
368 embryonic chicken. However, more studies are needed to elucidate the  
369 detailed mechanism how DNA methylation impacts lncRNA expression  
370 and how the lncRNA regulates myogenesis.

371

## 372 **Materials and Methods**

### 373 **Sample collection**

374 The fertilized eggs of Rose and WhiteLoughorn were incubated in the  
375 same condition. The breast muscle and blood were collected at E10, E13,  
376 E16, E19. After sex determination, only samples identified as male were  
377 kept for next experiment. A total of 24 embryonic chicken were used in  
378 the study to form eight groups: E10, E13, E16, E19 for Rose and  
379 WhiteLoughorn, respectively. Each group included 3 individuals as  
380 biological replicates.

381

### 382 **DNA and RNA extraction**

383 Genomic DNA was extracted using an animal genomic DNA kit  
384 (Tiangen, China) following the manufacturer's instructions. The DNA  
385 integrity and concentration were measured by agarose gel electrophoresis  
386 and NanoDrop spectrophotometer, respectively. Total RNA was isolated  
387 using TRIzol (TAKARA, Dalian, China) 110 reagent according to the  
388 manufacturers' instruction. RNA was reverse 111 transcribed by  
389 TAKARA PrimeScript™ RT reagent kit (TAKARA) 112 according to  
390 the manufacturers' instruction.

391

### 392 **Library construction and sequencing**

393 Bisulfite sequencing libraries were prepared using the TruSeq Nano

394 DNA LT kit (Illumina, San Diego, CA, USA). The genomic DNAs were  
395 then fragmented into 100–300 bp by sonication (Covaris, USA) and  
396 purified using a MiniElute PCR Purification Kit (QIAGEN, Silicon  
397 Valley Redwood City, CA, USA). The fragmented DNAs were end  
398 repaired and a single ‘A’ nucleotide was appended to the 3’ end of each  
399 fragment. After ligating the DNAs to the sequencing adapters, the  
400 genomic fragments were bisulfite converted via a Methylation-Gold kit  
401 (ZYMO, Murphy Ave. Irvine, CA, USA). The converted DNA fragments  
402 were PCR amplified and sequenced as paired-end reads using the  
403 Illumina HiSeq xten platform by the Biomarker Technologies company  
404 (Beijing, China).

405

#### 406 **Data alignment and process**

407 The raw data in the FastQ format generated by the Illumina HiSeq  
408 were pre-processed by removing reads containing adapters, N (unknown  
409 bases) > 10%, and those which over 50% of the sequence exhibited low  
410 quality value (Qphred score  $\leq 10$ ). During the process, we also calculated  
411 the Q20, Q30, CG content for each sample data. The reads remained after  
412 this procedure were clean reads and used for subsequent analysis. The  
413 methylation data were aligned to reference genome *Gallus gallus* 5.0 by  
414 Bismark software<sup>36</sup>. Meanwhile, the number of aligned clean reads in  
415 unique position of reference genome were calculated as unique mapped

416 reads number. The proportion of the number of aligned reads in the total  
417 number of reads was calculated as the mapping rate. Subsequently, the  
418 methylation level of single base was then calculated by the ratio of the  
419 number of methylated reads to the sum of total reads covered the locus.  
420 Finally, we used a binominal distribution test approach to determine  
421 whether a locus was regarded as methylated locus with the criteria:  
422 coverage depth  $> 4$  and  $FDR < 0.05$ <sup>36</sup>.

423 The transcriptional libraries were sequenced on an Illumina HiSeq  
424 xten platform at the Biomarker Technologies Company (Beijing, China).  
425 The obtained transcriptome data were filtered by removing sequences  
426 containing adaptors, low-quality reads (Q-value  $< 20$ ), and reads  
427 containing more than 10% of unknown nucleotides (N) and were aligned  
428 to reference genome *Gallus gallus* 5.0 by HISAT2<sup>37</sup> then the transcript  
429 assembly and FPKM calculation were performed using the StringTie<sup>38</sup>.  
430 Transcripts mapped to the coding genes of reference were used to  
431 subsequent differential expression gene calling.

432

### 433 **LncRNA identification**

434 In order to identify the potential lncRNA, the assembled transcripts  
435 generated from the StringTie were submitted to CPC<sup>39</sup>, CNCI<sup>40</sup>, CPAT<sup>41</sup>  
436 and pfam<sup>42</sup> software with default parameters to predict the potential  
437 lncRNAs. Only transcripts predicted as lncRNA shared among four tools

438 were regarded as candidate lncRNA. Then the cis-target gene of lncRNA  
439 were defined as neighbor gene in 100 kb genomic distance from the  
440 lncRNA and were identified using in-house script. The trans-target  
441 prediction of lncRNAs was performed by LncTar software<sup>43</sup>.

442

### 443 **DMLs and DMRs calling**

444 The differential methylation locus (DMLs) and differential  
445 methylation regions (DMRs) between broilers and layers at each  
446 comparison were detected separately using Dispersion Shrinkage for  
447 Sequencing Data (DSS) package in R<sup>44-47</sup>. The differential methylation  
448 regions (DMRs) were then calculated in with default parameters.  
449 Subsequently, DMRs were annotated using ChIPseeker package in R<sup>48</sup>.

450 Gene overlapped with at least one DMR is defined as differential  
451 methylation gene (DMG). Common DMRs among 4 developmental  
452 stages were identified by merging all positions of DMRs in 24 samples  
453 and re-calculating the methylation level for each merged DMR position  
454 with an average approach using mCpG data.

455

### 456 **DEGs and DELs calling**

457 The differential expression genes (DEGs) calling and the differential  
458 expression lncRNA (DEL) calling between two populations at each time  
459 point were performed separately using the DEseq<sup>49</sup>. The results were

460 filtering with the criteria: (1) fold change >2 (2) FDR<0.5. The transcripts  
461 satisfied both standards were regarded as DEGs or DELs.

462

### 463 **Functional enrichment analysis and WGCNA analysis**

464 Gene ontology enrichment analyses were conducted for DMGs at  
465 E10, E13, E16, E19 comparisons respectively to explore their potential  
466 roles in muscle development. These analyses were performed by  
467 clusterProfiler package implemented in R<sup>50</sup>. A hypergeometric test was  
468 applied to map DMGs to terms in the GO database to search for  
469 significantly enriched terms in DMGs compared to the genome  
470 background.

471 The WGCNA analysis was performed using WGCNA package  
472 implemented in R<sup>51</sup>. We used all the differential expression lncRNAs and  
473 all the genes as input. Then, variable coefficient was used to filter  
474 transcripts with low expression change. The variable coefficient was  
475 calculated as follow:  $C_v = \sigma/\mu$ . The  $\sigma$  is the standard deviation and  $\mu$   
476 represents the mean value of expression of input transcripts. Only  
477 transcripts with ranked top 30% high  $C_v$  value were used for WGCNA  
478 analysis. After the entire network was constructed, only genes with  
479 connectivity more than 0.15 were selected for subsequent subnetwork  
480 analysis.

481

## 482 **Validation for RNA-seq by quantitative Real-time RCP(Q-PCR)**

483 Total RNA was purified and reversely transcribed into cDNA using  
484 PrimerScriptR RT reagent Kit with gDNA Eraser (Takara Biotechnology  
485 (Dalian) Co., Ltd) following the specification. Quantities of mRNA were  
486 then measured with qRT-PCR using a CFX96™ real-time PCR  
487 detection system (Bio-Rad, USA). The qRT-PCR assays were then  
488 performed with a volume of 20  $\mu$ L containing 10  $\mu$ L SYBR Green  
489 Mixture, 7  $\mu$ L deionized water, 1  $\mu$ L template of cDNA, 1  $\mu$ L of each  
490 primer and with following thermal conditions: 95 °C for 5 min, 45 cycles  
491 of 95 °C for 10 sec, 60 °C for 10 sec, 72 °C for 10 sec. Primer sequences  
492 used for qRT-PCR assays are displayed in Supplementary Table 17.  
493  $\beta$ -actin gene was used as internal control. Each qPCR assay was carried  
494 out in triplicate. The relative gene expression was calculated by using the  
495  $2^{-\Delta\Delta C_t}$  method.

496

## 497 **Cell cultures**

498 Post-hatch chickens (7-day-old commercial generation Avian broiler  
499 chicks) were purchased from Wenjiang Charoen Pokphand Livestock &  
500 Poultry Co., Ltd. The pectoralis muscle was removed and used for  
501 preparation of primary myogenic cultures. About 5 g of muscle was finely  
502 minced and treated with 0.1% collagenase I (Sigma, MO, USA) followed  
503 by 0.25% trypsin (Hyclone, UT, USA) to release cells. Then, the cell

504 suspension was subjected to Percoll density centrifugation to separate  
505 myoblasts from contaminating myofibril debris and nonmyogenic cells.  
506 Cells were plated in 25 cm<sup>3</sup> cell culture bottles with complete medium  
507 [DMEM/F12 (Invitrogen, Carlsbad, CA) +15% FBS (Gibco, NY, USA)  
508 +10% horse serum (Hyclone, UT, USA) +1% penicillin-streptomycin  
509 (Solarbio, Beijing, China) +3% chicken embryo extraction]. The cells  
510 cultured at 37 °C and 5% CO<sub>2</sub> with saturating humidity, which were  
511 allowed to proliferate in growth medium for 2-4 d, and the medium was  
512 refresh every 24 h. To induce differentiation, satellite cells were grown to  
513 80% confluence in growth medium, and the replaced with differentiation  
514 medium composed of DMEM, 2% horse serum and 1%  
515 penicillin-streptomycin, and the medium was refreshed every 24 h.

516

### 517 **LncRNA silencing**

518 Chicken satellite cells were cultivated in 6-well plates and  
519 transfected with siRNAs: 5'-GGAAGGGAGUAGGUGGUAATT-3' and  
520 5'-UUACCACCUACUCCCUUCCTT -3'; Sangon Biotech, Shanghai,  
521 China) when grown to a density of approximate 70% in plates. In contrast,  
522 control cells were transfected with negative siRNA with same other  
523 condition. The transfection reagent was Lipofectamine 3000 (Invitrogen,  
524 Carlsbad, CA, USA). The knockdown efficiency was assessed by  
525 quantitative RT-PCR of lncRNA MYH1-AS.



## 526 **Microscopy**

527 Cellular morphology was evaluated in differentiated myotubes by  
528 phase-contrast microscopy without preliminary fixation. Pictures were  
529 produced using the Olympus IX73 inverted microscope (OLYMPUS,  
530 Tokyo, Japan) and the Hamamatsu C11440 digital camera  
531 (HAMAMATSU, Shizuoka, Japan).

532

## 533 **Western blot assay**

534 The cells were collected from the cultures, placed in the RIPA lysis  
535 buffer on ice (BestBio, Shanghai, China). The whole proteins were  
536 subjected to 10% sodium dodecyl sulfate polyacrylamide gel  
537 electrophoresis (SDS-PAGE) and then transferred to polyvinylidene  
538 fluoride membranes (PVDF; Millipore Corporation, Billerica, MA, USA).  
539 The PVDF membrane was incubated with 5% defatted milk powder at  
540 room temperature for 1 h, then incubation with the following specific  
541 primary antibodies at 4°C overnight: anti-MyoG (Abcam), anti-MyHC  
542 (Abcam) and anti- $\beta$ -Actin (Abcam). The secondary antibodies  
543 HRP-labeled rabbit IgG (Cell Signaling) were added at room temperature  
544 for 1h. Following each step, the membranes were washed five times with  
545 PBS-T for 3 min. The proteins were visualized by enhanced  
546 chemiluminescence (Amersham Pharmacia Biotech, Piscataway, NJ,  
547 USA) with a Kodak imager (Eastman Kodak, Rochester, NY, USA).

548 Quantification of protein blots was performed using the Quantity One  
549 1-D software (version 4.4.0) (Bio-Rad, Hercules, CA, USA) on images  
550 acquired from an EU-88 image scanner (GE Healthcare, King of Prussia,  
551 PA, USA).

552

553

554

555

556

557

558

559

560

561

562

563

564

565

566

567

568

569

570 **Fig 1.** Genome-wide profiles of DNA methylation among different  
571 sample groups. **(a)** Genomic methylation level in either layers or broilers  
572 at E10, E13, E16, E19, respectively. Methylation level were range from 0  
573 to 1. **(b-d)** Proportion of mCpG in different genomic features at different  
574 developmental stages in mCG, mCHG and mCHH contexts, respectively.  
575 **(e-g)** Methylation level of CpGs was equally divided into 10 intervals and  
576 the percentage of each interval were measured using E10 as example.

577

578 **Fig 2.** Comparatively measurement of methylation level of genes  
579 and lncRNA. **(a)** Comparison of methylation level of genes or lncRNAs  
580 between layers and broilers in three different contexts. **(b)** Measurement  
581 of methylation level of different types of lncRNAs. \*  $P < 0.05$ , \*\*  $P < 0.01$   
582 for comparison between two chicken lines. The red star means the  
583 methylation level of layers is significantly higher than broilers whereas  
584 the green star represents an opposite result. **(c-d)** Genomic methylation  
585 around genes and lncRNAs were measured across the genome,  
586 respectively. Transcripts were separated into seven regions (upstream,  
587 first exon, first intron, inner exon, inner intron, last exon and downstream)  
588 and each region was equally divided into 20 bins for visualization.

589

590 **Fig 3.** Methylation level of different types of TEs using E19 as an  
591 example. **(a)** Comparatively measurement of methylation of SINE, LINE,

592 LTR, DNA, Satellite regions between two chicken lines in mCG context.

593 **(b)** Methylation of different types of TEs for upstream, body and  
594 downstream regions in three different contexts using 20 bins across the  
595 whole genome.

596

597 **Fig 4.** Analyses of DMRs at 4 developmental stages. DMR calling  
598 were performed in mCG, mCHG and mCHH, respectively. **(a)** Numbers  
599 of DMRs in different genomic features (promoter, exon, intron, intergenic,  
600 and UTR regions). **(b)** Relative proportion of hyper DMRs to hypo  
601 DMRs in different CpG contexts. **(c)** The results of Gene Ontology (GO)  
602 analysis for genes with overlapped with DMR. Only part of the terms was  
603 selected for display. The red color means GO-BP terms, the blue color  
604 means GO-CC terms whereas green color represents GO-MF terms. The  
605 number in bracket means number of genes enriched in a specific term.

606

607 **Fig 5.** Heatmap clustering analysis and PCA analysis. **(a)** Heatmap  
608 clustering using merged common DMRs among 24 samples (see  
609 Materials and Methods). **(b)** The result of PCA analysis using common  
610 DMRs among 24 samples. Only the first component and the second  
611 component were visualized.

612

613 **Fig 6.** LncRNAs identification and correlation analysis between

614 methylome and transcriptome. **(a)** Number of different types of lncRNAs  
615 in all developmental stages. **(b)** Venn diagram of lncRNAs identified  
616 through different software. **(c)** Hierarchical cluster analysis of lncRNAs  
617 using their expression level. Replicates were merged together in the  
618 analysis. **(d-g)** The genes and lncRNAs were divided into five groups  
619 based on their expression levels, respectively. Then the methylation level  
620 around TSS and TES of each group were measured using 20 bins across  
621 the whole genome for layers and broilers.

622

623 **Fig 7.** Comprehensive analysis of lncRNA MYH1-AS. **(a)**  
624 visualization of the transcript of MYH1-AS and DMR overlapped it. **(b)**  
625 Correlation between methylation of DMR and expression of MYHA-AS  
626 using Spearman method. **(c)** Correlation between expression of  
627 MYH1-AS and expression of its potential target MYH1E. **(d)** The whole  
628 gene-lncRNA network and subnetwork including MYH1-AS extracted  
629 from the entire network. **(e)** Relationship between correlation and  
630 connectivity of gene and MYH1-AS. The red points represent genes with  
631 both high connectivity and correlation with MYH1-A and were selected  
632 for subsequent GO analysis. **(f)** Comparison of connectivity value  
633 between genes selected (red points) and all genes with in the subnetwork  
634 (background). \*  $P < 0.05$ , \*\*  $P < 0.01$  for comparison between selected  
635 genes and background. **(g)** Results of GO analysis for genes selected.

636           **Fig 8. (a)** Expression level of MYH1-AS in layers and broilers at  
637 different developmental stages. **(b)** Verification of lncRNA MYH1-AS  
638 expression at four developmental stages by qPCR. **(c)** lncRNA Silencing  
639 efficiency. \*  $P < 0.05$ , \*\*  $P < 0.01$  for comparison between control and  
640 silenced group. **(d-f)** The mRNA expression of MyoD1, MyH3 and  
641 MyoG in control and MYH1-AS silenced groups, respectively. \*  $P < 0.05$ ,  
642 \*\*  $P < 0.01$  for comparison between control and silenced group. **(g-h)** The  
643 morphological changes in myotubes after silencing. **(8i)** The protein  
644 expression of MyHC and MyoG comparison between control and  
645 silenced group, respectively.

646

647

648

649

650

651

652

653

654

655

656

657

658

659

660

661

662

663

664

665

666

667

668

669

670

671

672

673

674

675

676

677

678

679

## 680 **References**

- 681 1. Goldberg, A. D., Allis, C. D. and Bernstein, E. 2007, Epigenetics: a landscape takes shape.  
682 *Cell*, **128**, 635-638.
- 683 2. Guttman, M., Amit, I., Garber, M., et al. 2009, Chromatin signature reveals over a  
684 thousand highly conserved large non-coding RNAs in mammals. *Nature*, **458**, 223.
- 685 3. Feinberg, A. P. 2007, Phenotypic plasticity and the epigenetics of human disease. *Nature*,  
686 **447**, 433-440.
- 687 4. Sanford, J. P., Clark, H. J., Chapman, V. M. and Rossant, J. 1987, Differences in DNA  
688 methylation during oogenesis and spermatogenesis and their persistence during early  
689 embryogenesis in the mouse. *Genes & Development*, **1**, 1039-1046.
- 690 5. Zhou, Z. Y., Li, A., Wang, L. G., et al. 2015, DNA methylation signatures of long intergenic  
691 noncoding RNAs in porcine adipose and muscle tissues. *Scientific Reports*, **5**, 15435.
- 692 6. Yang, Y., Liang, G., Niu, G., et al. 2017, Comparative analysis of DNA methylome and  
693 transcriptome of skeletal muscle in lean-, obese-, and mini-type pigs. *Scientific Reports*,  
694 **7**.
- 695 7. Cesana, M., Cacchiarelli, D., Legnini, I., et al. 2011, A long noncoding RNA controls  
696 muscle differentiation by functioning as a competing endogenous RNA. *Cell*, **147**,  
697 358-369.
- 698 8. Jaenisch, R. and Bird, A. 2003, Epigenetic regulation of gene expression: how the genome  
699 integrates intrinsic and environmental signals.
- 700 9. Miyata, K., Miyata, T., Nakabayashi, K., et al. 2015, DNA methylation analysis of human  
701 myoblasts during in vitro myogenic differentiation: de novo methylation of promoters of  
702 muscle-related genes and its involvement in transcriptional down-regulation. *Human*  
703 *Molecular Genetics*, **24**, 410-423.
- 704 10. Huszar, G. 1972, Developmental Changes of the Primary Structure and Histidine  
705 Methylation in Rabbit Skeletal Muscle Myosin. *Nature New Biology*, **240**, 260-264.
- 706 11. Huang, Y. Z., Sun, J. J., Zhang, L. Z., et al. 2014, Genome-wide DNA methylation profiles  
707 and their relationships with mRNA and the microRNA transcriptome in bovine muscle  
708 tissue (*Bos taurine*). *Scientific Reports*, **4**, 6546.
- 709 12. Zhang, M., Yan, F. B., Li, F., et al. 2017, Genome-wide DNA methylation profiles reveal  
710 novel candidate genes associated with meat quality at different age stages in hens.  
711 *Scientific Reports*, **7**, 45564.
- 712 13. Carrière, E., Déry, E., Villanueva, A., Lois, S., et al. 2015, Deconstruction of DNA methylation  
713 patterns during myogenesis reveals specific epigenetic events in the establishment of the  
714 skeletal muscle lineage. *Stem Cells*, **33**, 2025-2036.
- 715 14. Zhi, H., Li, X., Wang, P., et al. 2017, Lnc2Meth: a manually curated database of regulatory  
716 relationships between long non-coding RNAs and DNA methylation associated with  
717 human disease. *Nucleic Acids Research*.
- 718 15. Zhang, C., Wang, X., Li, X., et al. 2017, The landscape of DNA methylation-mediated  
719 regulation of long non-coding RNAs in breast cancer. *Oncotarget*, **8**, 51134-51150.
- 720 16. Heilmann, K., Toth, R., Bossmann, C., Klimo, K., Plass, C. and Gerhauser, C. 2017,  
721 Genome-wide screen for differentially methylated long noncoding RNAs identifies Esrp2  
722 and lncRNA Esrp2-as regulated by enhancer DNA methylation with prognostic relevance



- 723 for human breast cancer. *Oncogene*.
- 724 17. Wu, W., Bhagat, T. D., Yang, X., et al. 2013, Hypomethylation of noncoding DNA regions  
725 and overexpression of the long noncoding RNA, AFAP1-AS1, in Barrett's esophagus and  
726 esophageal adenocarcinoma. *Gastroenterology*, **144**, 956.
- 727 18. Li, J., Li, R., Wang, Y., et al. 2015, Genome-wide DNA methylome variation in two  
728 genetically distinct chicken lines using MethylC-seq. *Bmc Genomics*, **16**, 1-13.
- 729 19. Li, Q., Wang, Y., Hu, X., Zhao, Y. and Li, N. 2015, Genome-wide Mapping Reveals  
730 Conservation of Promoter DNA Methylation Following Chicken Domestication. *Sci Rep*, **5**,  
731 8748.
- 732 20. Li, Q., Li, N., Hu, X., et al. 2011, Genome-wide mapping of DNA methylation in chicken.  
733 *Plos One*, **6**, e19428.
- 734 21. Jones, P. A. 2012, Functions of DNA methylation: islands, start sites, gene bodies and  
735 beyond. *Nature Reviews Genetics*, **13**, 484-492.
- 736 22. Li, S., Zhu, Y., Zhi, L., et al. 2016, DNA Methylation Variation Trends during the Embryonic  
737 Development of Chicken. *Plos One*, **11**, e0159230.
- 738 23. Hu, Y., Xu, H., Li, Z., et al. 2013, Comparison of the genome-wide DNA methylation  
739 profiles between fast-growing and slow-growing broilers. *Plos One*, **8**, e56411.
- 740 24. Wang, H., Wang, J., Ning, C., et al. 2017, Genome-wide DNA methylation and  
741 transcriptome analyses reveal genes involved in immune responses of pig peripheral  
742 blood mononuclear cells to poly I:C. *Scientific Reports*, **7**, 9709.
- 743 25. Lorincz, M. C., Dickerson, D. R., Schmitt, M. and Groudine, M. 2004, Intragenic DNA  
744 methylation alters chromatin structure and elongation efficiency in mammalian cells.  
745 *Nature Structural & Molecular Biology*, **11**, 1068-1075.
- 746 26. Garcia-Perez, J. L., Widmann, T. J. and Adams, I. R. 2016, The impact of transposable  
747 elements on mammalian development. *Development*, **143**, 4101-4114.
- 748 27. Waterland, R. A. and Jirtle, R. L. 2003, Transposable elements: targets for early nutritional  
749 effects on epigenetic gene regulation. *Molecular and cellular biology*, **23**, 5293-5300.
- 750 28. Kamm, K. E. and Stull, J. T. 2001, Dedicated myosin light chain kinases with diverse  
751 cellular functions. *Journal of Biological Chemistry*, **276**, 4527-4530.
- 752 29. Zhi, G., Ryder, J. W., Huang, J., et al. 2005, Myosin light chain kinase and myosin  
753 phosphorylation effect frequency-dependent potentiation of skeletal muscle contraction.  
754 *Proc Natl Acad Sci U S A*, **102**, 17519-17524.
- 755 30. Ohsawa, N., Koebis, M., Mitsuhashi, H., Nishino, I. and Ishiura, S. 2015, ABLIM1 splicing is  
756 abnormal in skeletal muscle of patients with DM 1 and regulated by MBNL, CELF and  
757 PTBP 1. *Genes to Cells*, **20**, 121-134.
- 758 31. Holness, M. J., Kraus, A., Harris, R. A. and Sugden, M. C. 2000, Targeted upregulation of  
759 pyruvate dehydrogenase kinase (PDK)-4 in slow-twitch skeletal muscle underlies the  
760 stable modification of the regulatory characteristics of PDK induced by high-fat feeding.  
761 *Diabetes*, **49**, 775-781.
- 762 32. Ying, F., Gu, H., Xiong, Y. and Zuo, B. 2017, Analysis of differentially expressed genes in  
763 gastrocnemius muscle between DGAT1 transgenic mice and wild-type mice. *BioMed  
764 research international*, **2017**.
- 765 33. Caremani, M., Yamamoto, D. L., Nigro, V., Lombardi, V., Bang, M. L. and Linari, M. 2014,  
766 The Role of Myopalladin in Skeletal Muscle. *Biophysical Journal*, **106**, 767a.

- 767 34. Shum, A. M., Mahendradatta, T., Taylor, R. J., et al. 2012, Disruption of MEF2C signaling  
768 and loss of sarcomeric and mitochondrial integrity in cancer-induced skeletal muscle  
769 wasting. *Aging (Albany NY)*, **4**, 133.
- 770 35. Luo, B., Ye, M., Xu, H., et al. 2018, Expression analysis, single-nucleotide polymorphisms  
771 of the Myoz1 gene and their association with carcass and meat quality traits in chickens.  
772 *Italian Journal of Animal Science*, 1-9.
- 773 36. Krueger, F. and Andrews, S. R. 2011, Bismark: a flexible aligner and methylation caller for  
774 Bisulfite-Seq applications. *Bioinformatics*, **27**, 1571-1572.
- 775 37. Kim, D., Langmead, B. and Salzberg, S. L. 2015, HISAT: a fast spliced aligner with low  
776 memory requirements. *Nature Methods*, **12**, 357.
- 777 38. Pertea, M., Pertea, G. M., Antonescu, C. M., Chang, T. C., Mendell, J. T. and Salzberg, S. L.  
778 2015, StringTie enables improved reconstruction of a transcriptome from RNA-seq reads.  
779 *Nature Biotechnology*, **33**, 290-295.
- 780 39. Kong, L., Zhang, Y., Ye, Z. Q., et al. 2007, CPC: assess the protein-coding potential of  
781 transcripts using sequence features and support vector machine. *Nucleic Acids Research*,  
782 **35**, W345.
- 783 40. Sun, L., Luo, H., Bu, D., et al. 2013, Utilizing sequence intrinsic composition to classify  
784 protein-coding and long non-coding transcripts. *Nucleic Acids Research*, **41**, e166.
- 785 41. Wang, L., Park, H. J., Dasari, S., Wang, S., Kocher, J. P. and Wei, L. 2013, CPAT:  
786 Coding-Potential Assessment Tool using an alignment-free logistic regression model.  
787 *Nucleic Acids Research*, **41**, e74-e74.
- 788 42. Finn, R. D., Tate, J., Mistry, J., et al. 2011, A: The Pfam protein families database. *Nucleic  
789 Acids Research*, **32**, D138.
- 790 43. Li, J., Ma, W., Zeng, P., et al. 2015, LncTar: a tool for predicting the RNA targets of long  
791 noncoding RNAs. *Briefings in Bioinformatics*, **16**, 806.
- 792 44. Wu, H., Wang, C. and Wu, Z. 2012, A new shrinkage estimator for dispersion improves  
793 differential expression detection in RNA-seq data. *Biostatistics*, **14**, 232-243.
- 794 45. Feng, H., Conneely, K. N. and Wu, H. 2014, A Bayesian hierarchical model to detect  
795 differentially methylated loci from single nucleotide resolution sequencing data. *Nucleic  
796 acids research*, **42**, e69-e69.
- 797 46. Wu, H., Xu, T., Feng, H., et al. 2015, Detection of differentially methylated regions from  
798 whole-genome bisulfite sequencing data without replicates. *Nucleic acids research*, **43**,  
799 e141-e141.
- 800 47. Park, Y. and Wu, H. 2016, Differential methylation analysis for BS-seq data under general  
801 experimental design. *Bioinformatics*, **32**, 1446-1453.
- 802 48. Yu, G., Wang, L. G. and He, Q. Y. 2015, ChIPseeker: an R/Bioconductor package for ChIP  
803 peak annotation, comparison and visualization. *Bioinformatics*, **31**, 2382-2383.
- 804 49. Anders, S., McCarthy, D. J., Chen, Y., et al. 2013, Count-based differential expression  
805 analysis of RNA sequencing data using R and Bioconductor. *Nature Protocols*, **8**, 1765.
- 806 50. Yu, G., Wang, L.-G., Han, Y. and He, Q.-Y. 2012, clusterProfiler: an R package for  
807 comparing biological themes among gene clusters. *Omics: a journal of integrative  
808 biology*, **16**, 284-287.
- 809 51. Langfelder, P. and Horvath, S. 2008, WGCNA: an R package for weighted correlation  
810 network analysis. *BMC bioinformatics*, **9**, 559.

811

**Fig 1a****Methylation Level of Different Developmental Stages**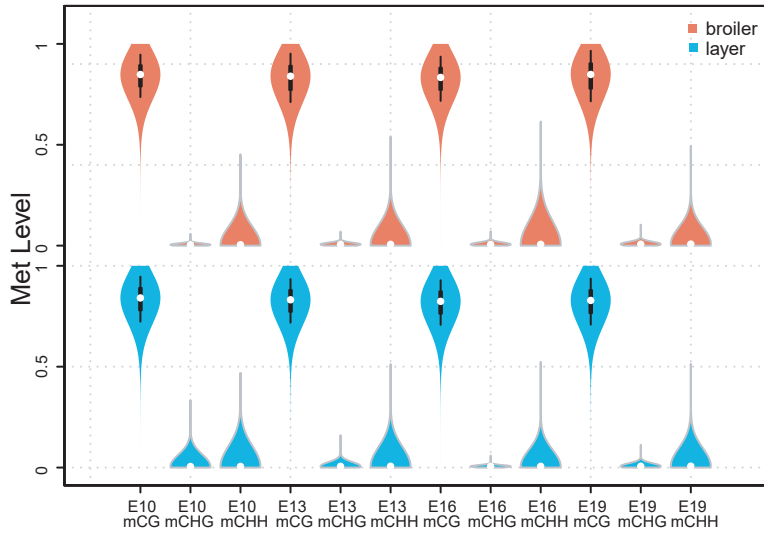**Fig 1b**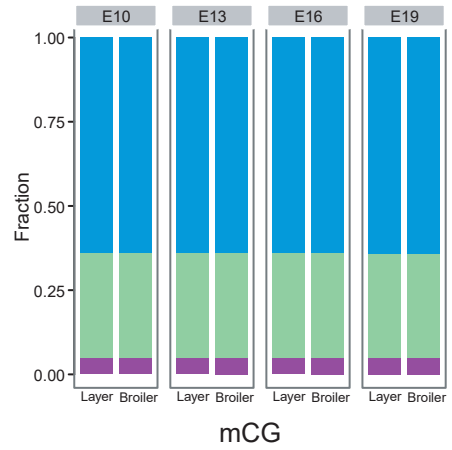**Fig 1c**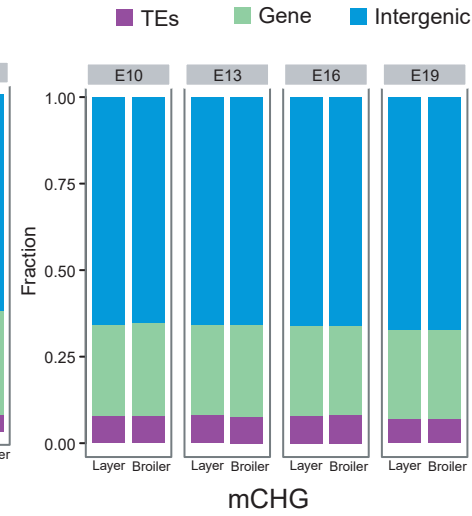**Fig 1d**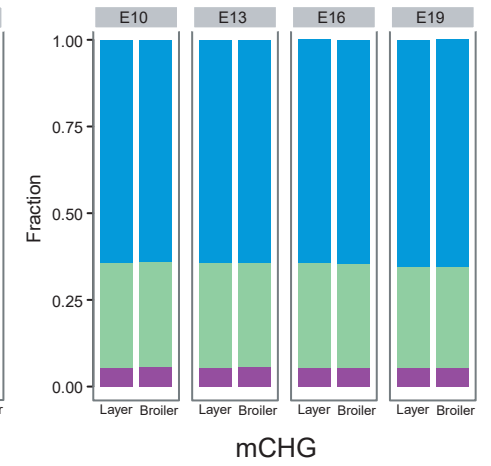**Fig 1e**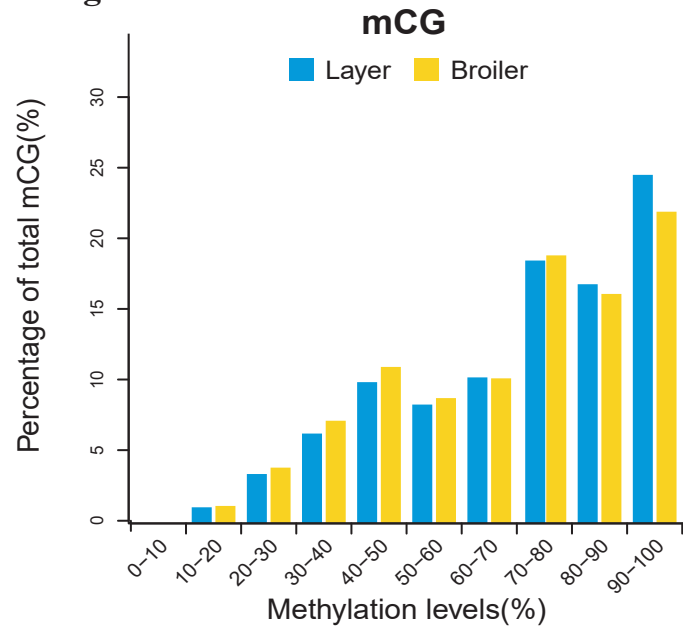**Fig 1f**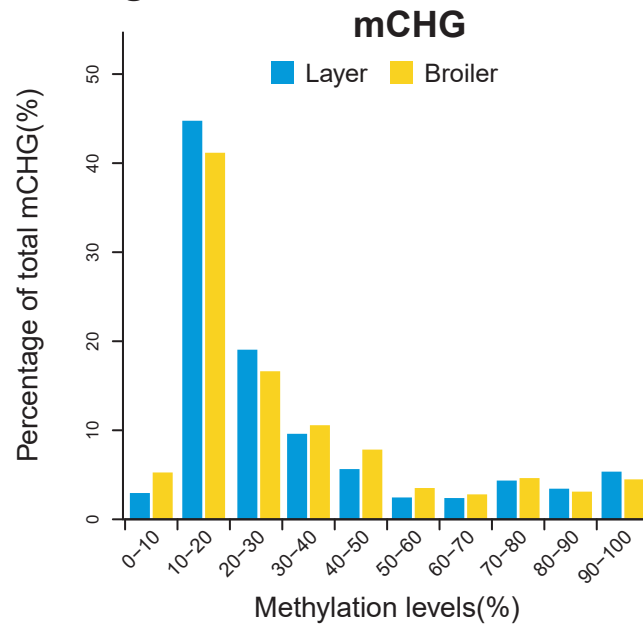**Fig 1g**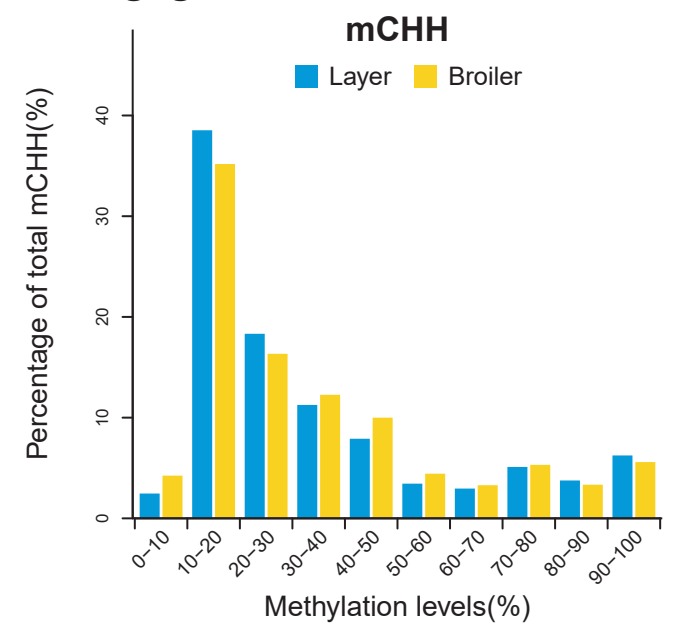

**Fig 2a**

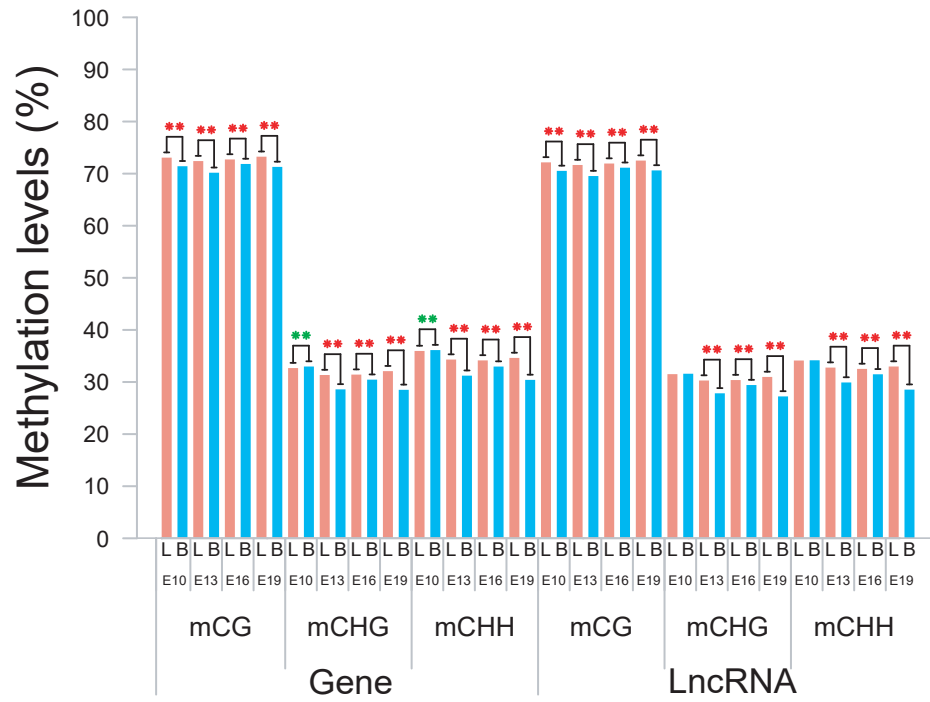

**Fig 2b**

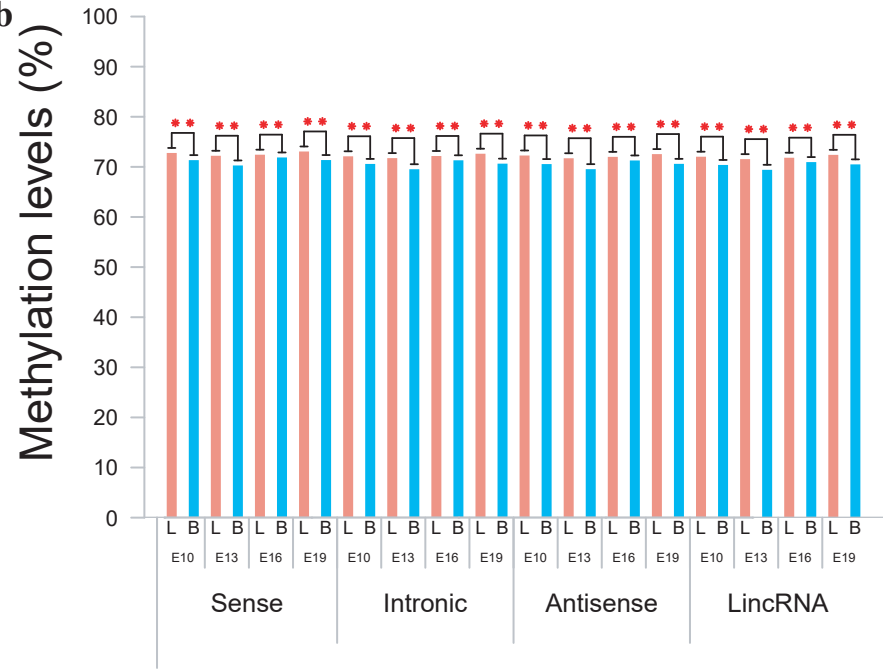

**Fig 2c**

**Methylation Level of of CG/CHG/CHH of Different Gene Elements**

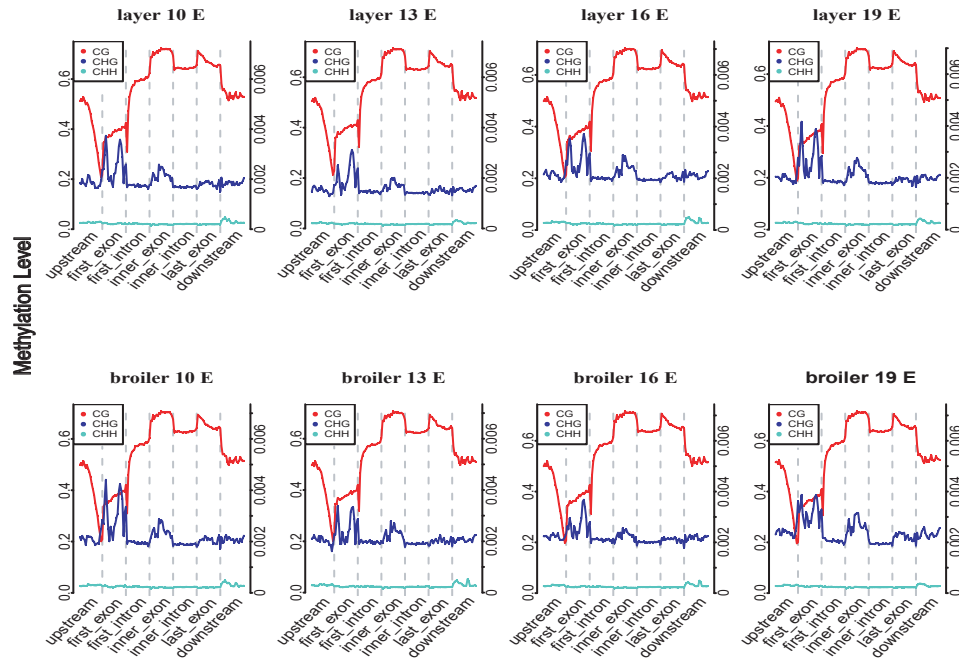

**Fig 2d**

**Methylation Level of of CG/CHG/CHH of Different Gene Elements**

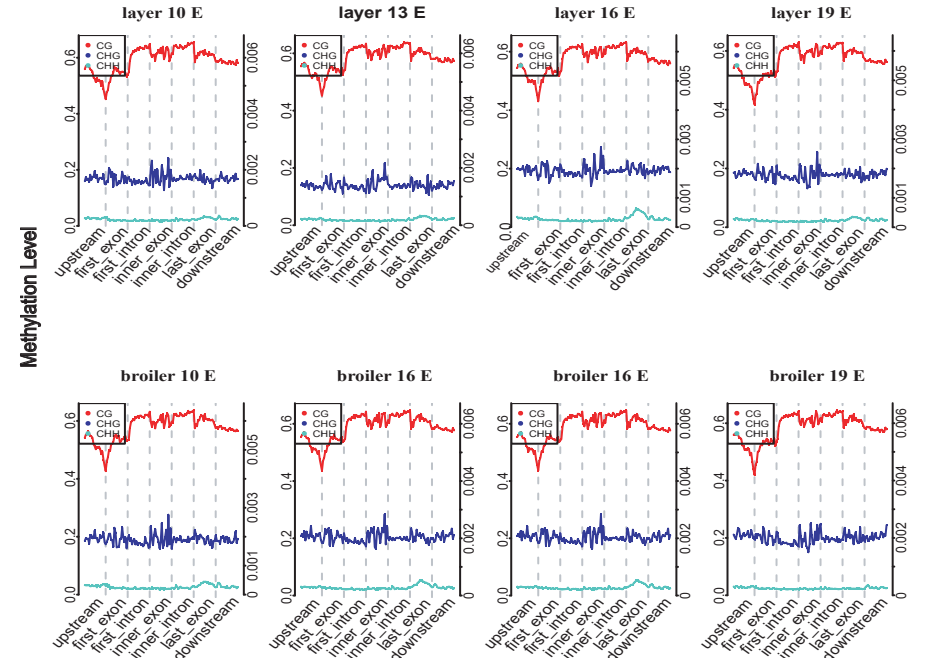

**Fig 3a**

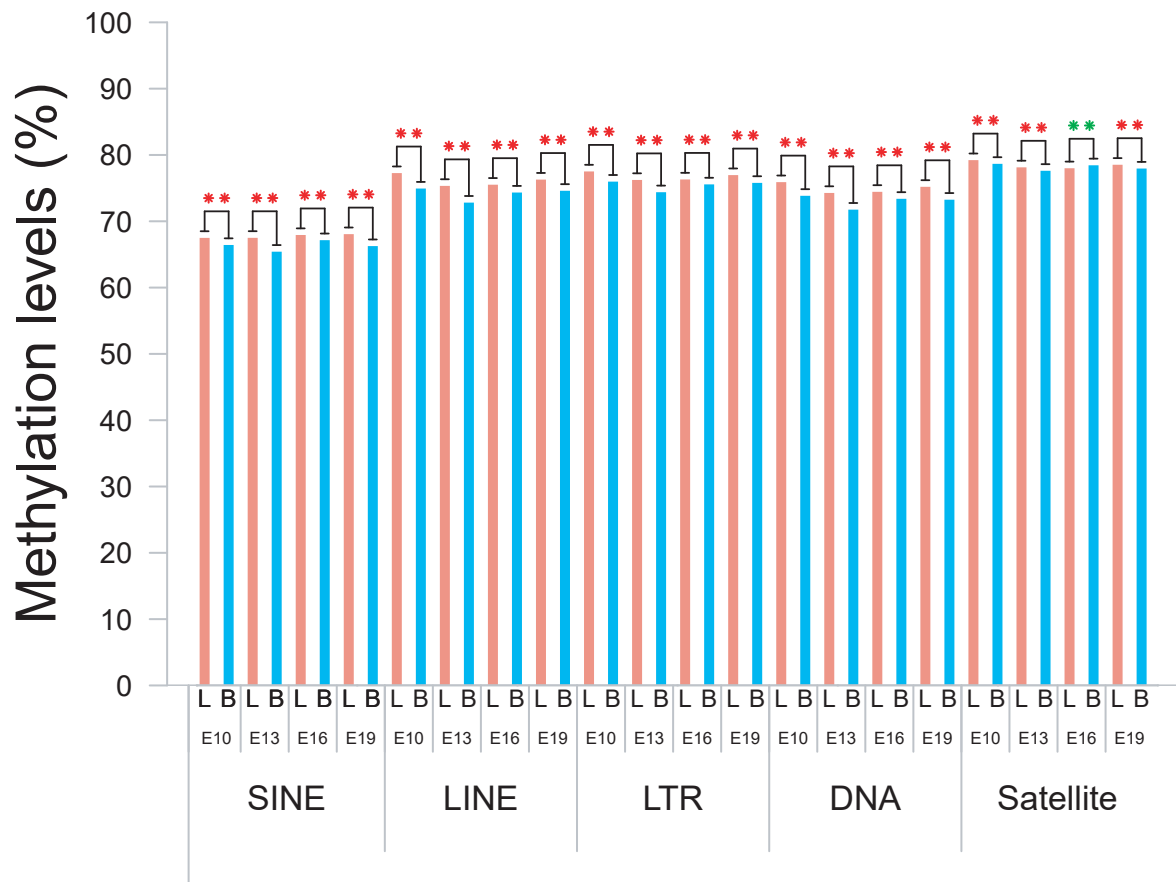

**Fig 3b**

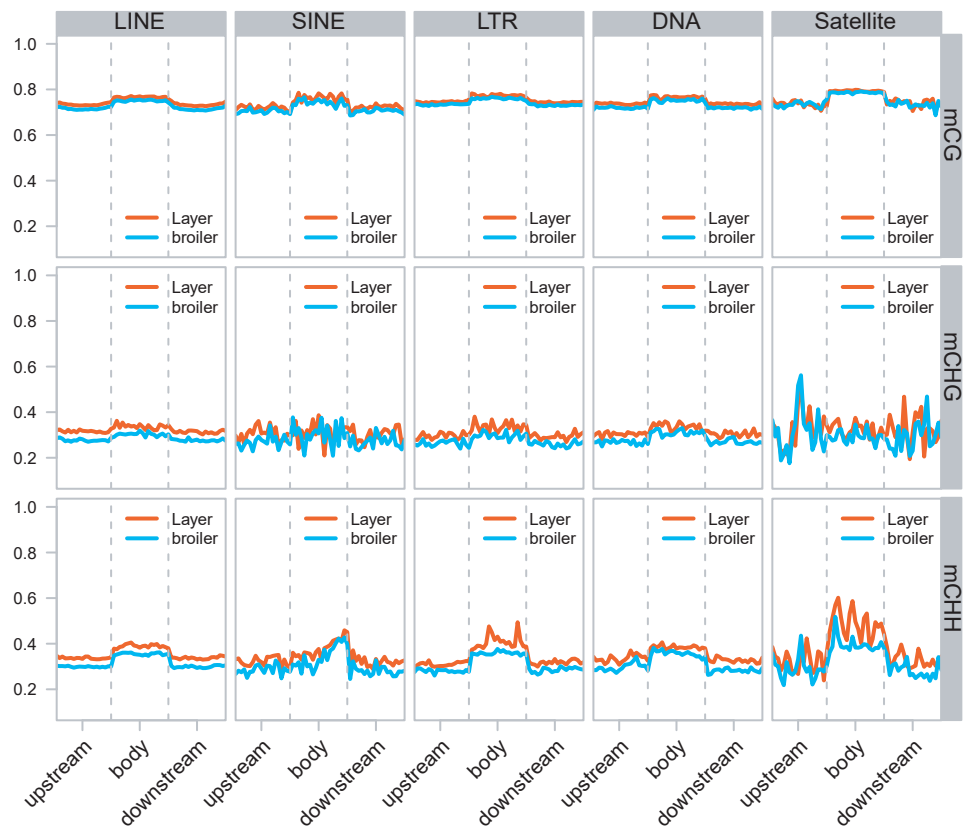

**Fig 4a**

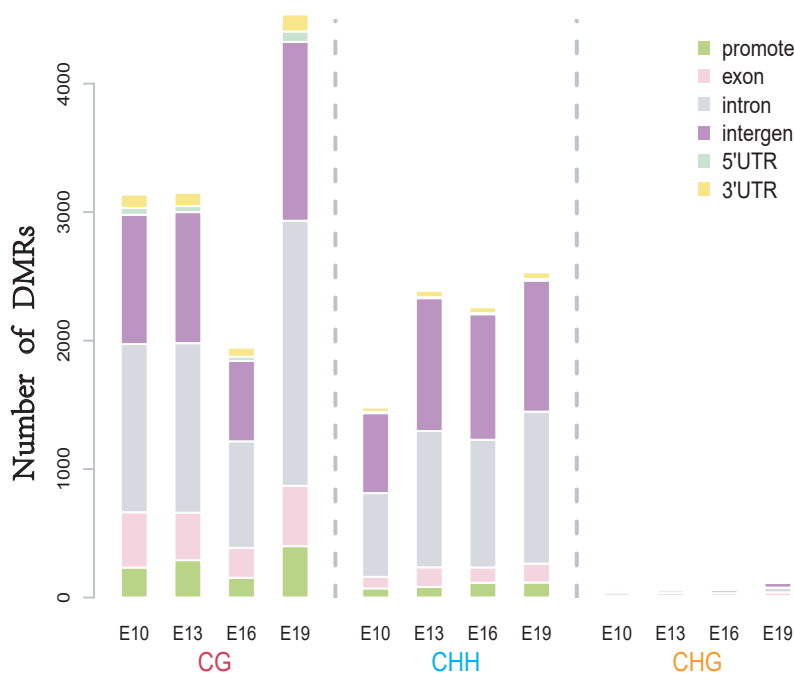

**Fig 4b**

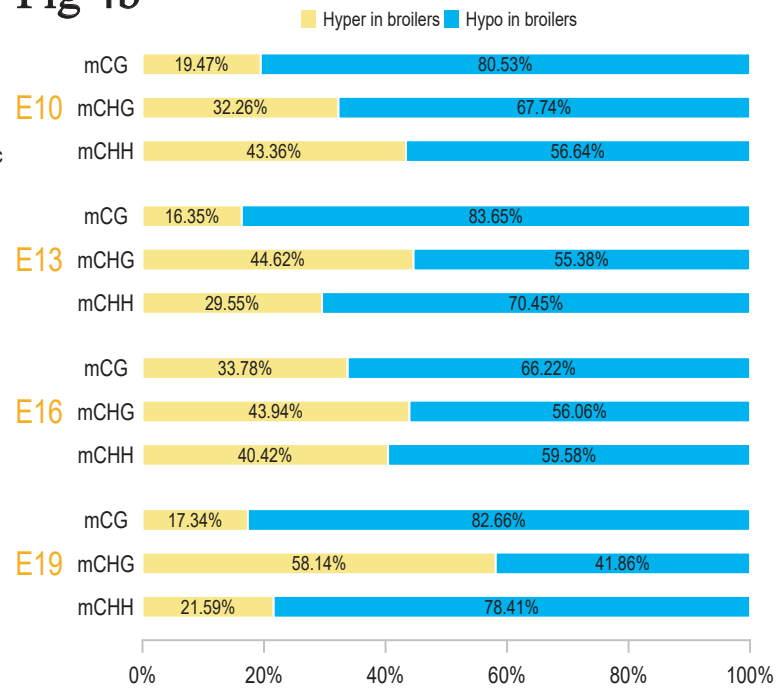

**Fig 4c**

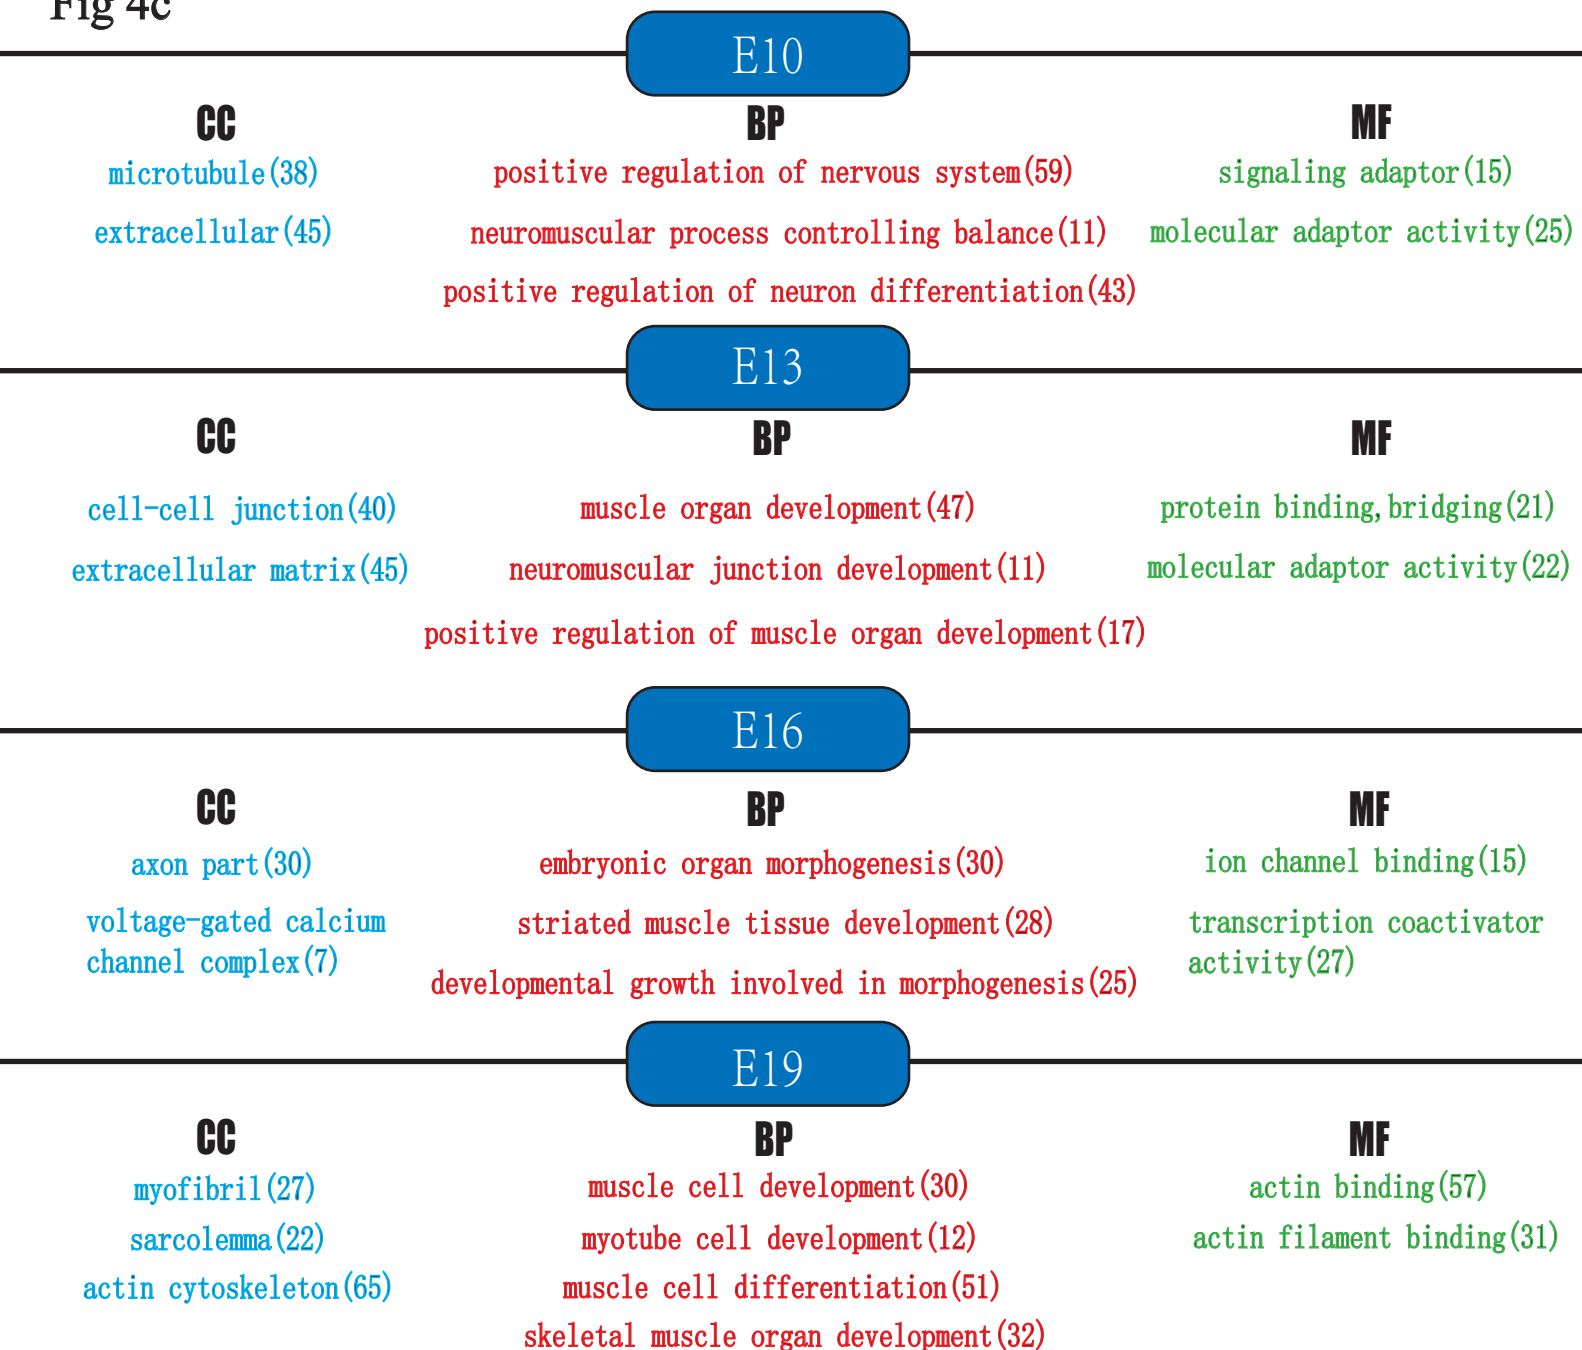

Fig 5a

Heatmap of 24 Samples Using Merged Common DMRs

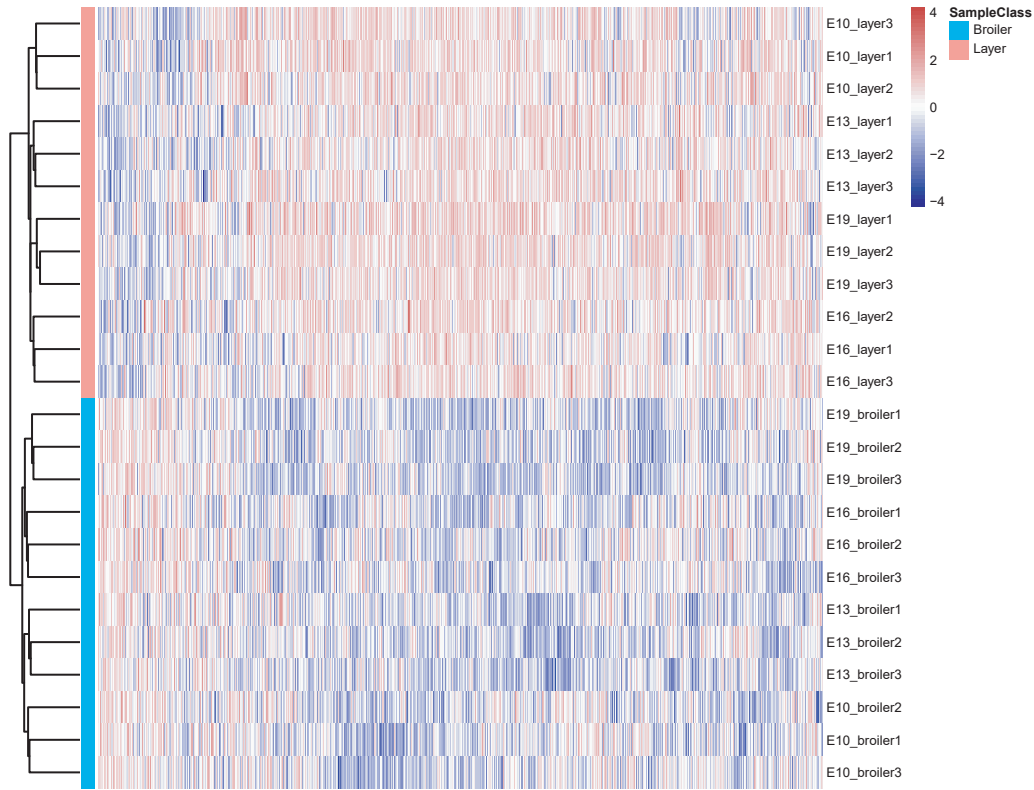

Fig 5b

PCA Of 24 Samples Using Merged Common DMRs

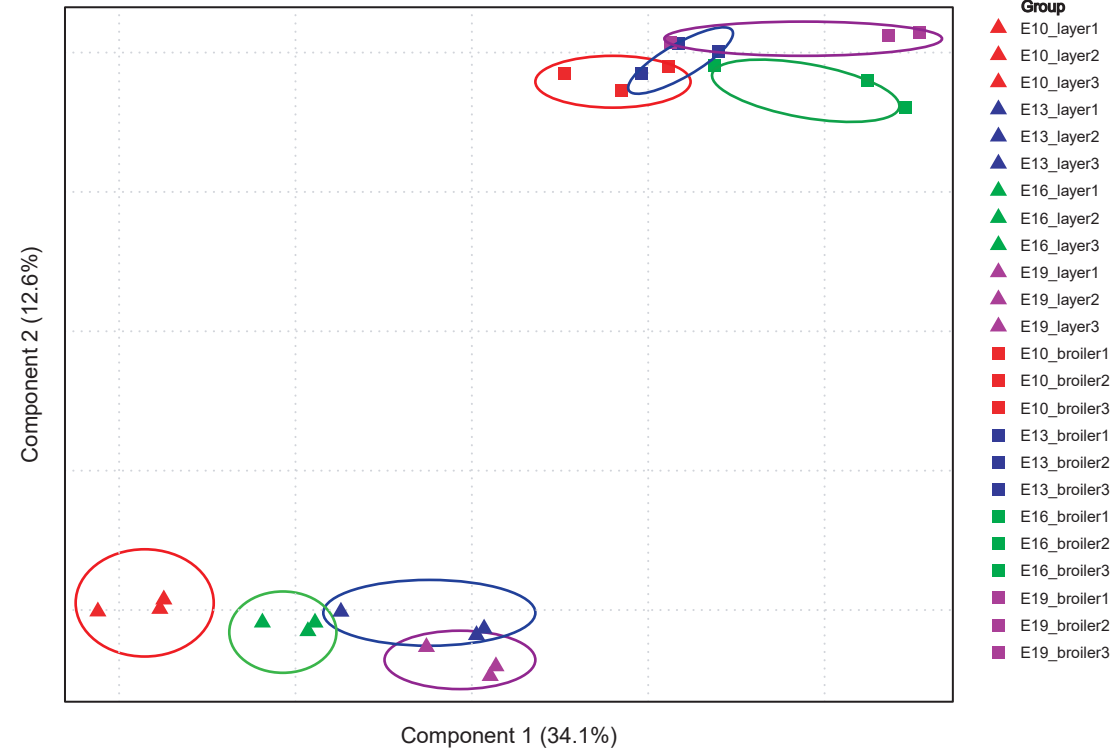



**Fig 6a**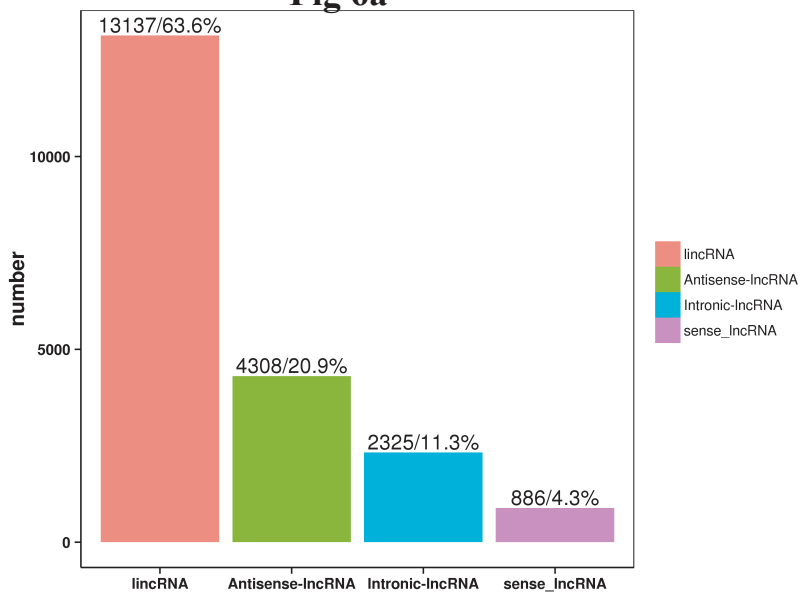**Fig 6b**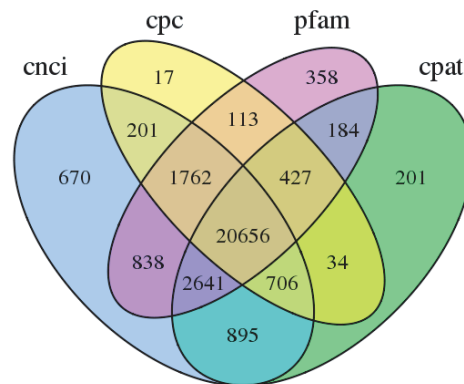**Fig 6c**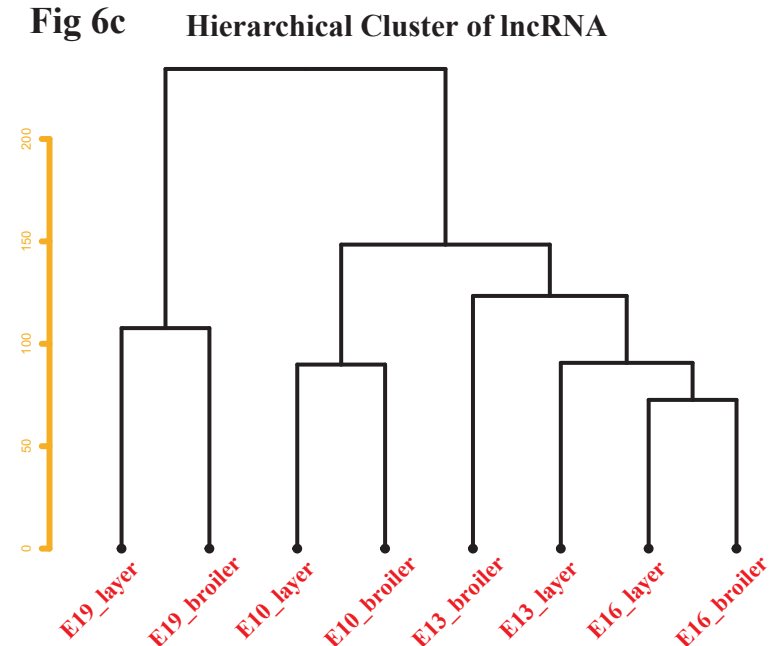**Fig 6d****Methylation level of genes**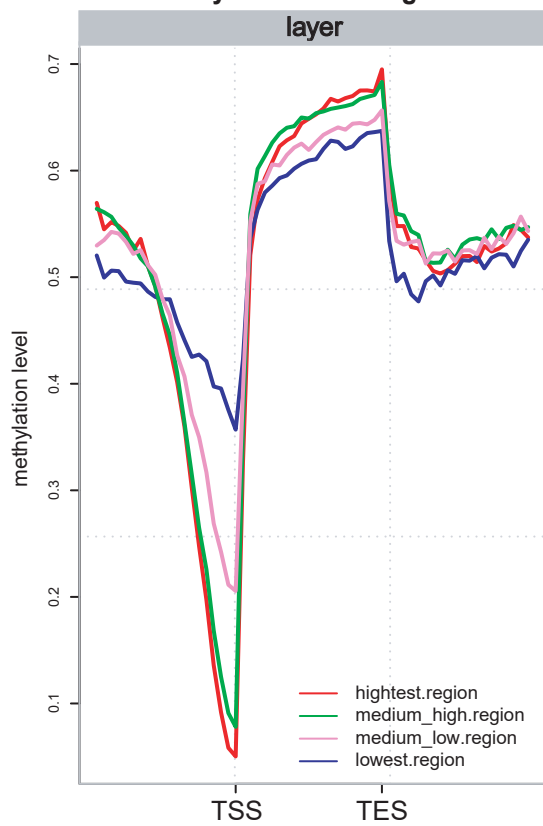**Fig 6e****Methylation level of genes**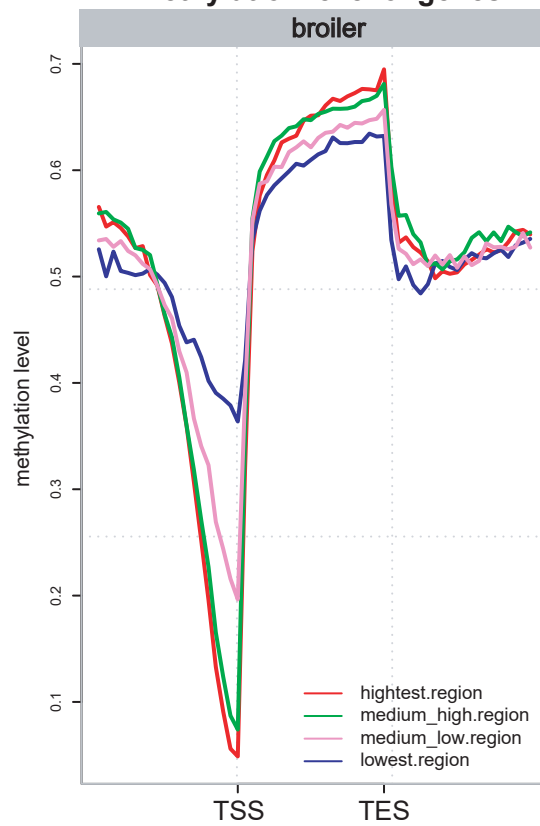**Fig 6f****Methylation level of lincRNAs**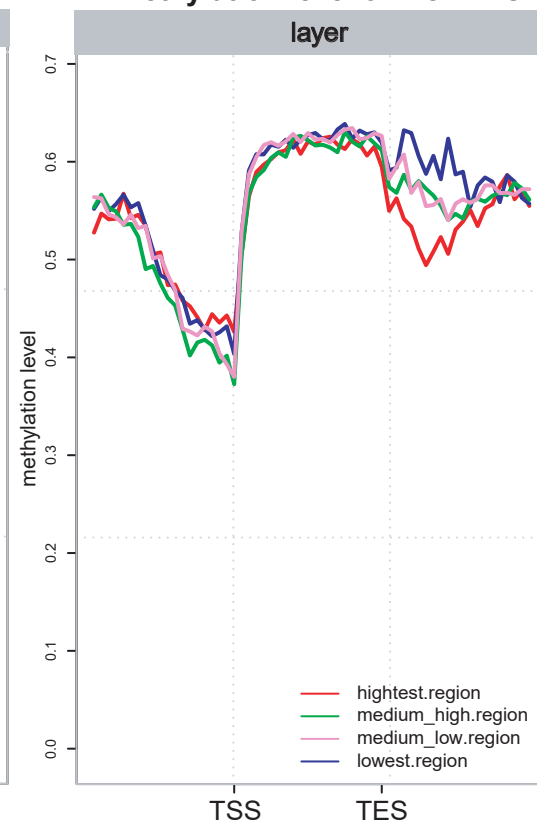**Fig 6g****Methylation level of lincRNAs**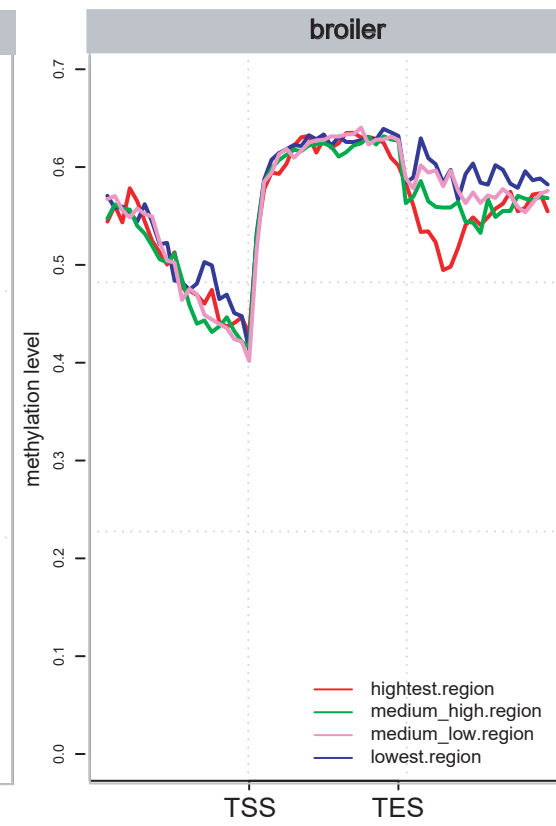

Fig 7a

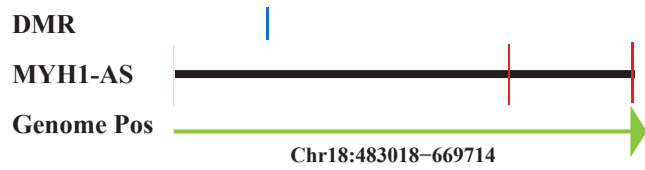

Fig 7b

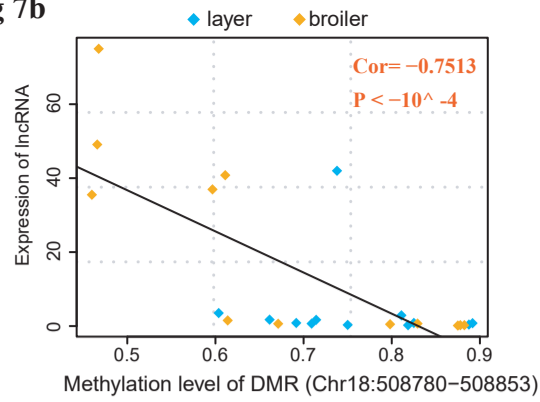

Fig 7c

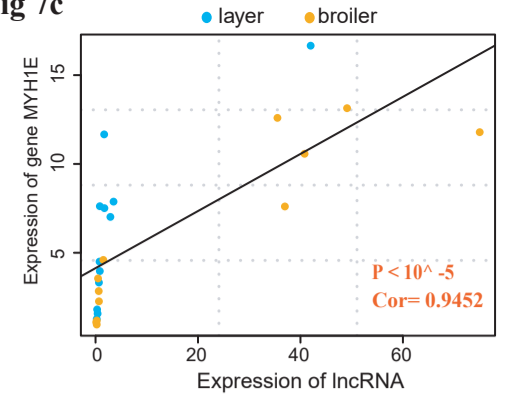

Fig 7d

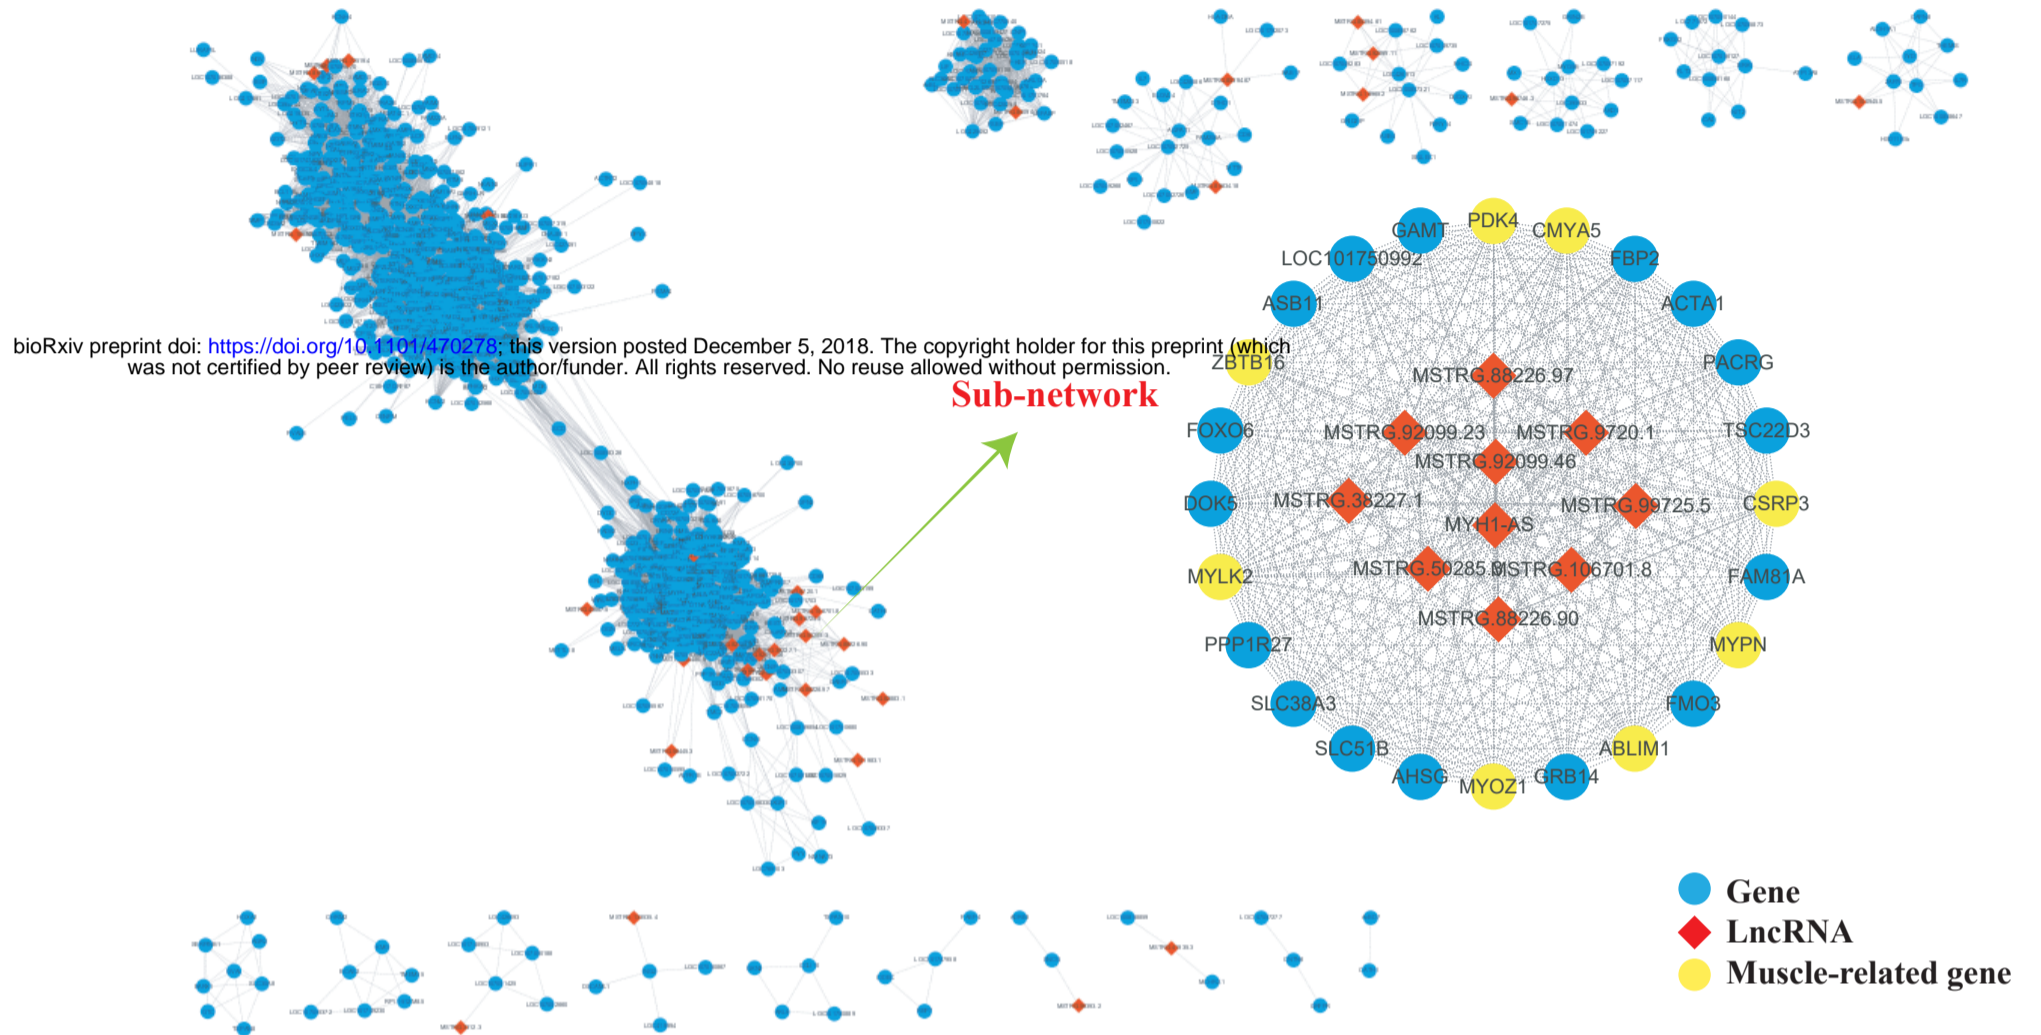

Fig 7e

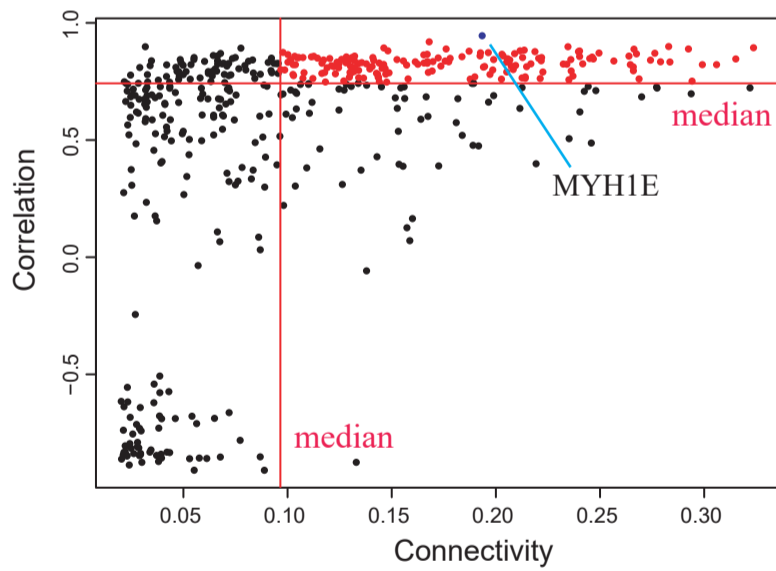

Fig 7f

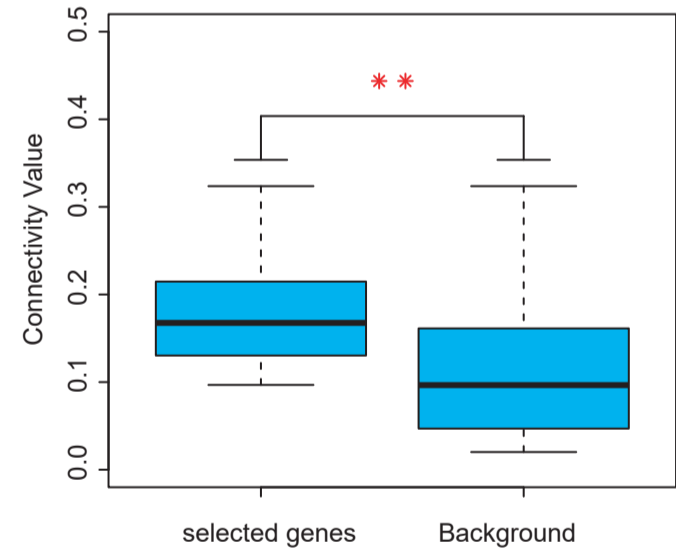

Fig 7g

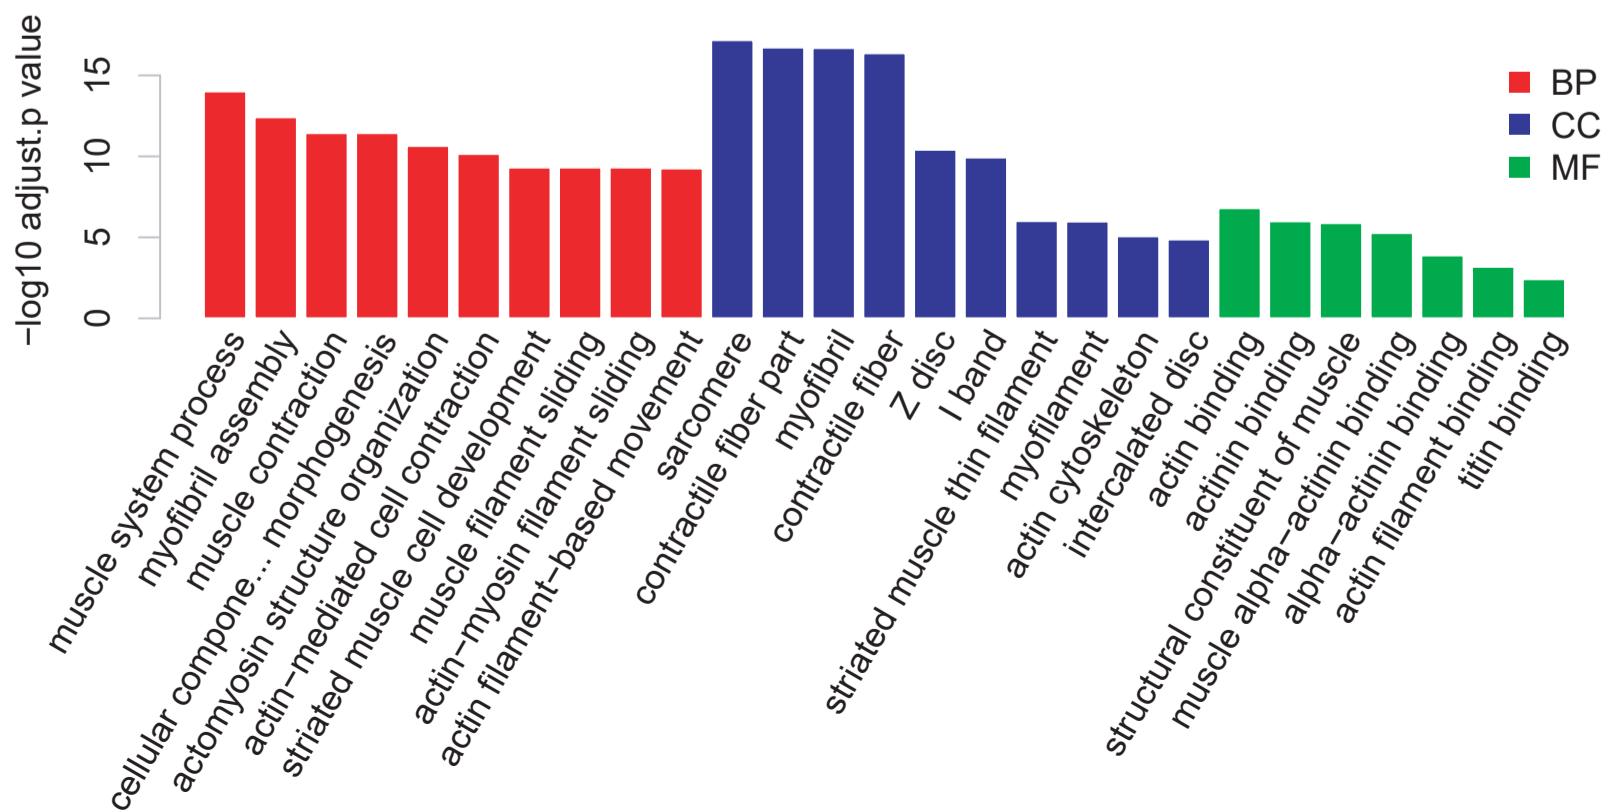

**Fig 8a**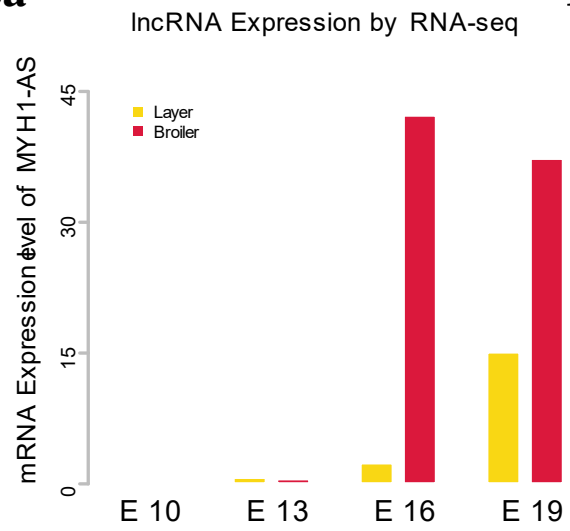**Fig 8b**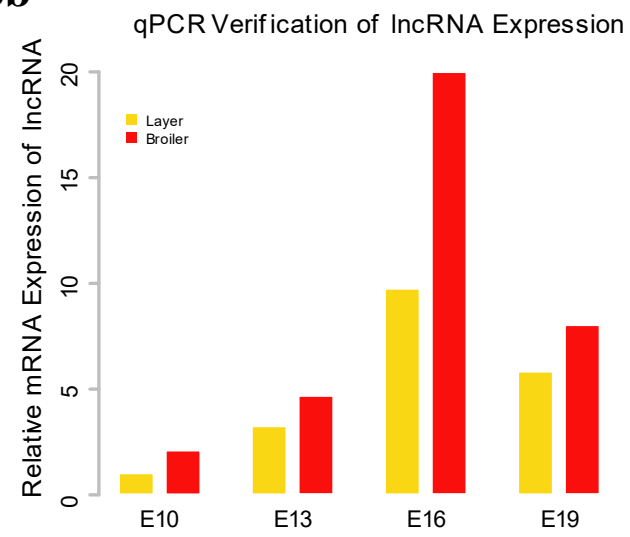**Fig 8c**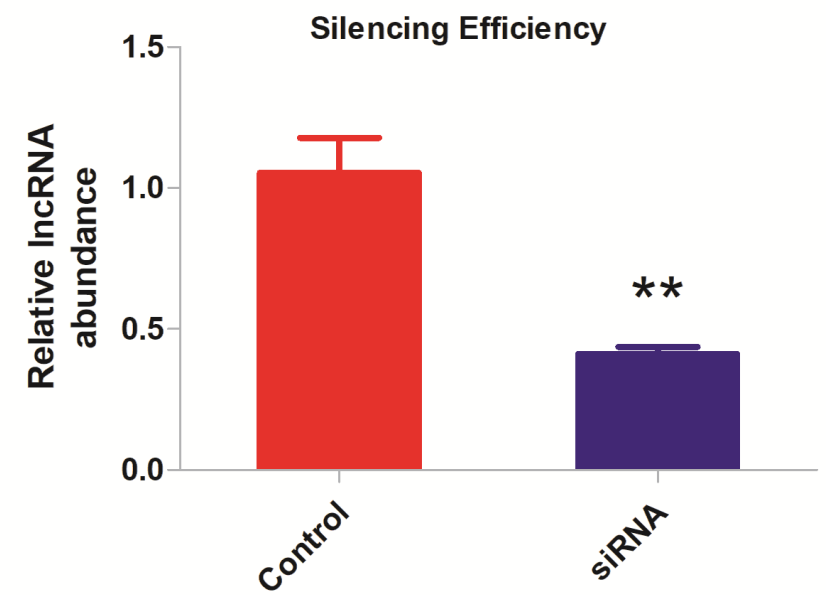**Fig 8d**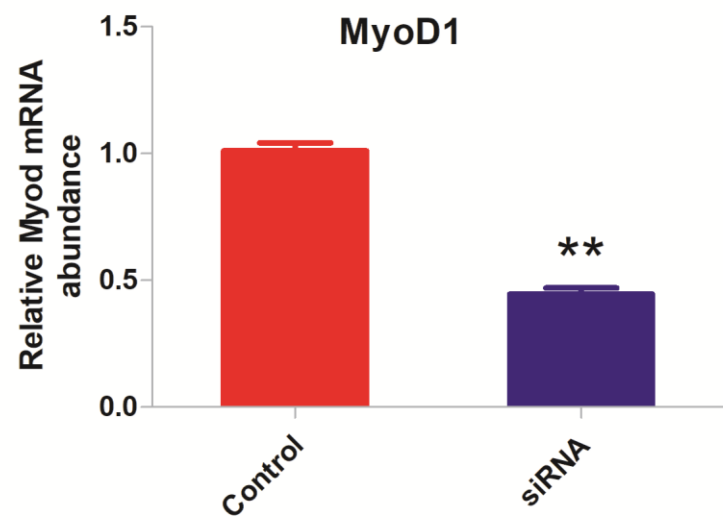**Fig 8e**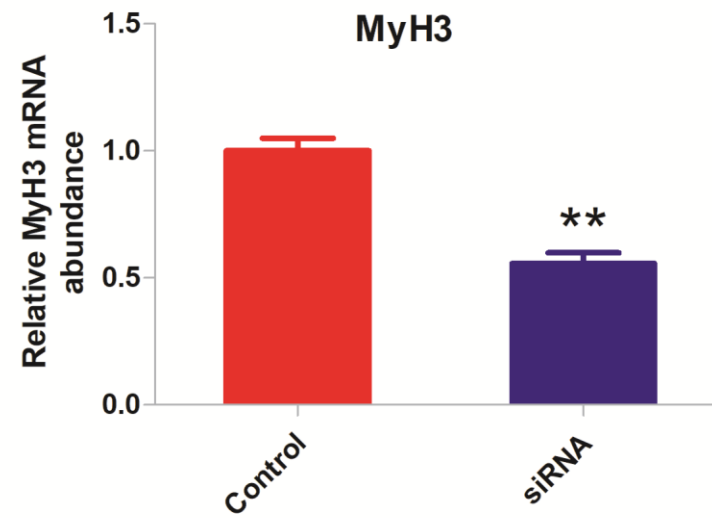**Fig 8f**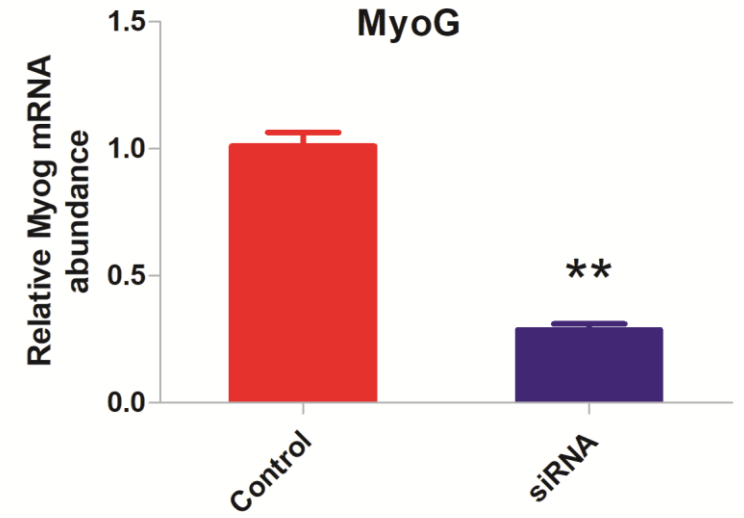**Fig 8g**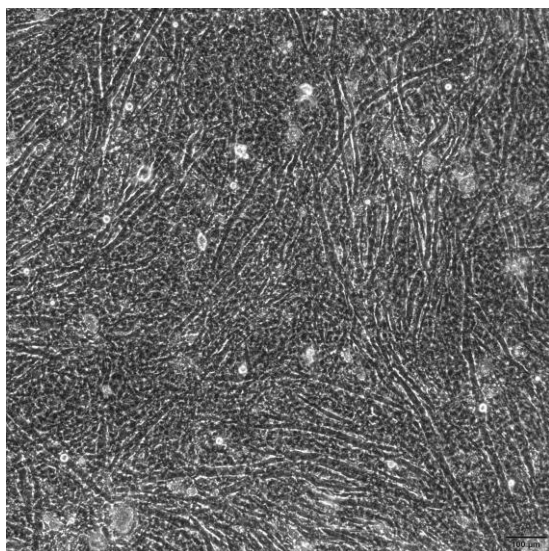**Fig 8h**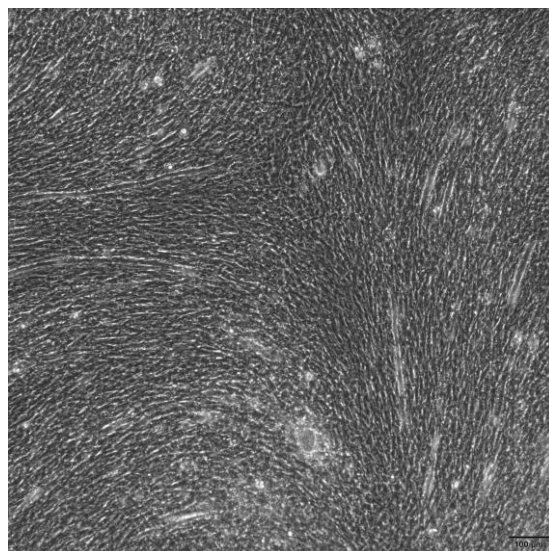**Fig 8i**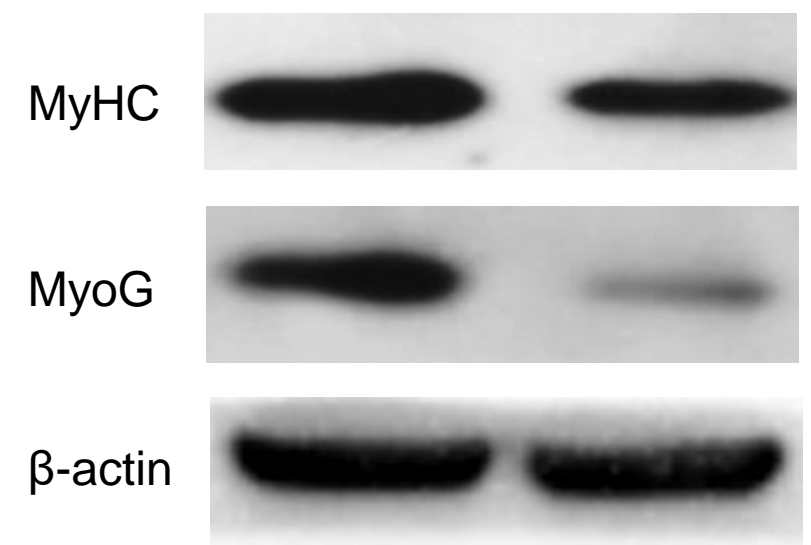

Source: https://www.biorxiv.org/content/10.1101/470278v4.full.pdf
